# Supplementary material for: Testing plastomes and nuclear ribosomal DNA sequences as the next-generation DNA barcodes for species identification and phylogenetic analysis in Acer
Source: PubMed Central journal article supplement (PMC11112886; doi:10.1186/s12870-024-05073-w), 2024-05-23
Supplement: 12870_2024_5073_MOESM1_ESM.pdf [file 12870_2024_5073_MOESM1_ESM.pdf]

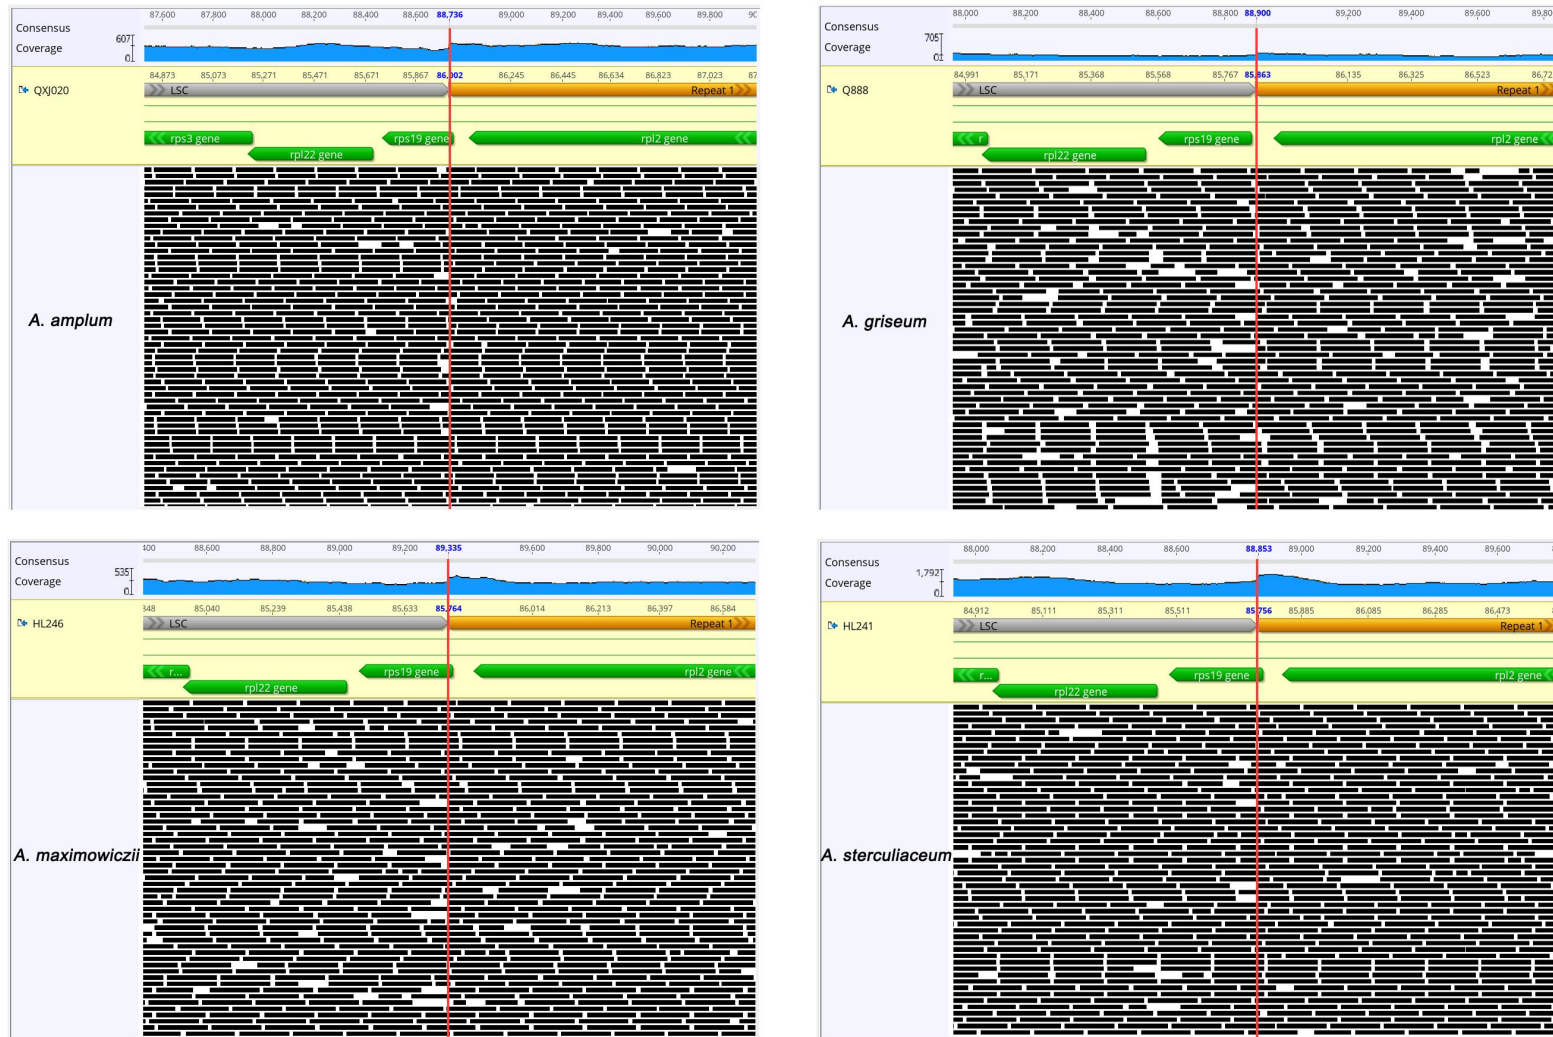

**Fig. S1.** The validations of IR boundary for 4 *Acer* species. The black bars represent NGS reads successfully mapped to the plastome, and the red vertical line marks the position of the IR boundary. The image was captured from Geneious.

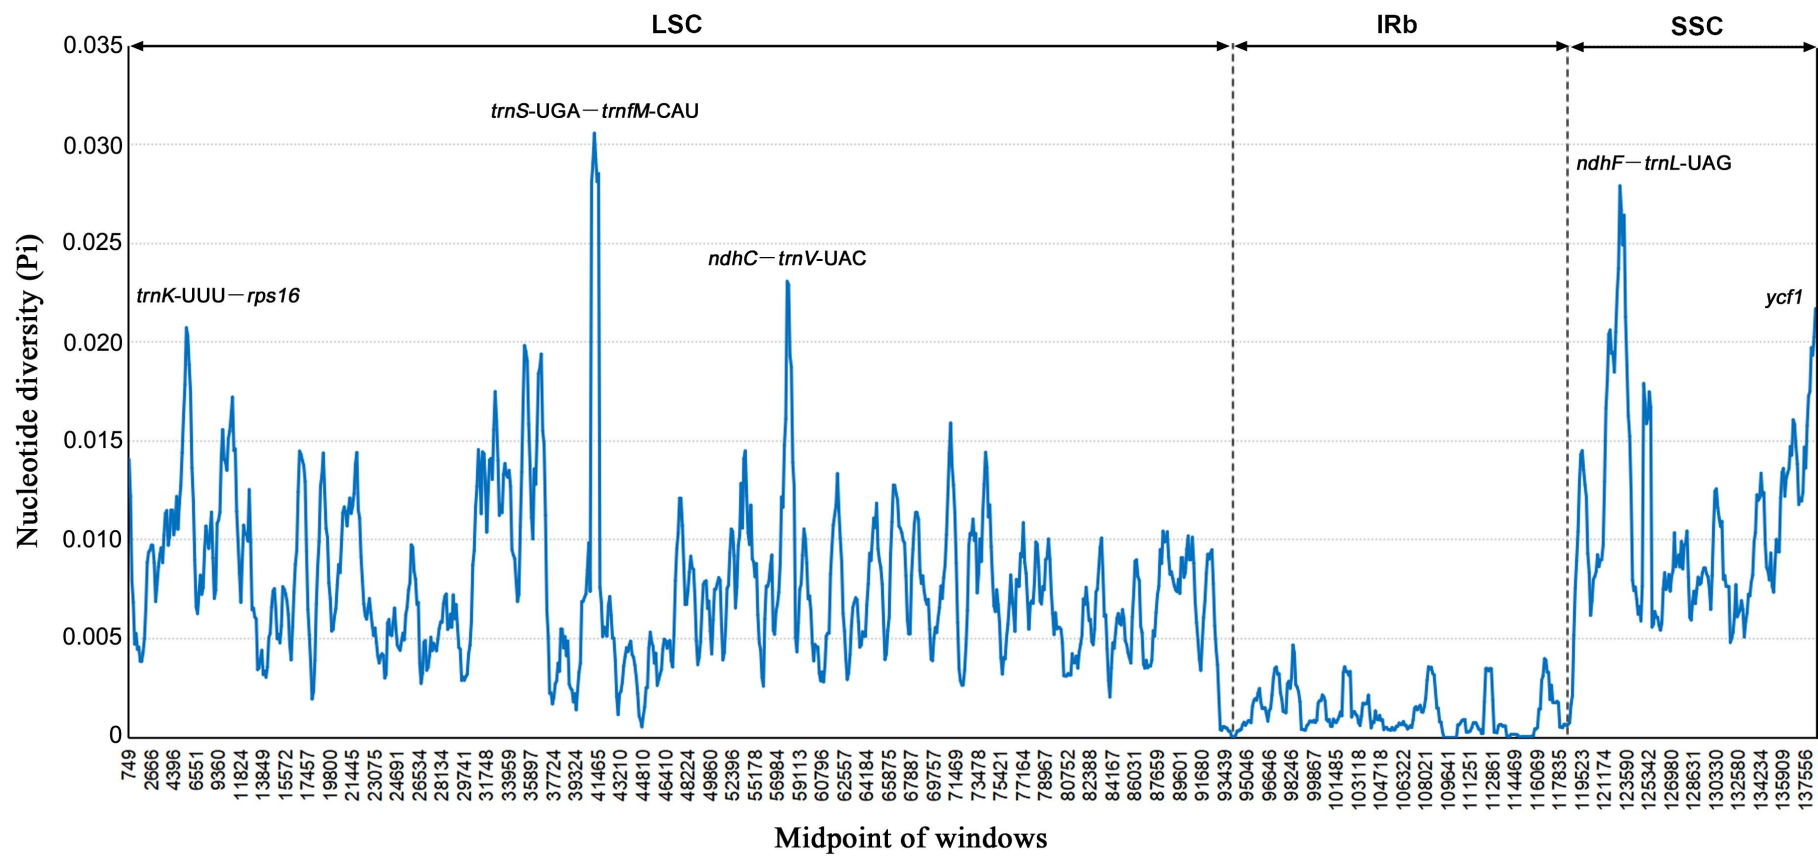

**Fig. S2.** Sliding window analysis of *Acer* plastomes. window length: 600 bp, step size: 100 bp.

Section

- Palmata*
- Arguta*
- Macrantha*
- Platanoidea*
- Oblonga*
- Trifoliata*
- Spicata*
- Negundo*
- Ginnala*
- Hyptiocarpa*
- Acer*
- Lithocarpa*
- Indivisa*
- outgroup

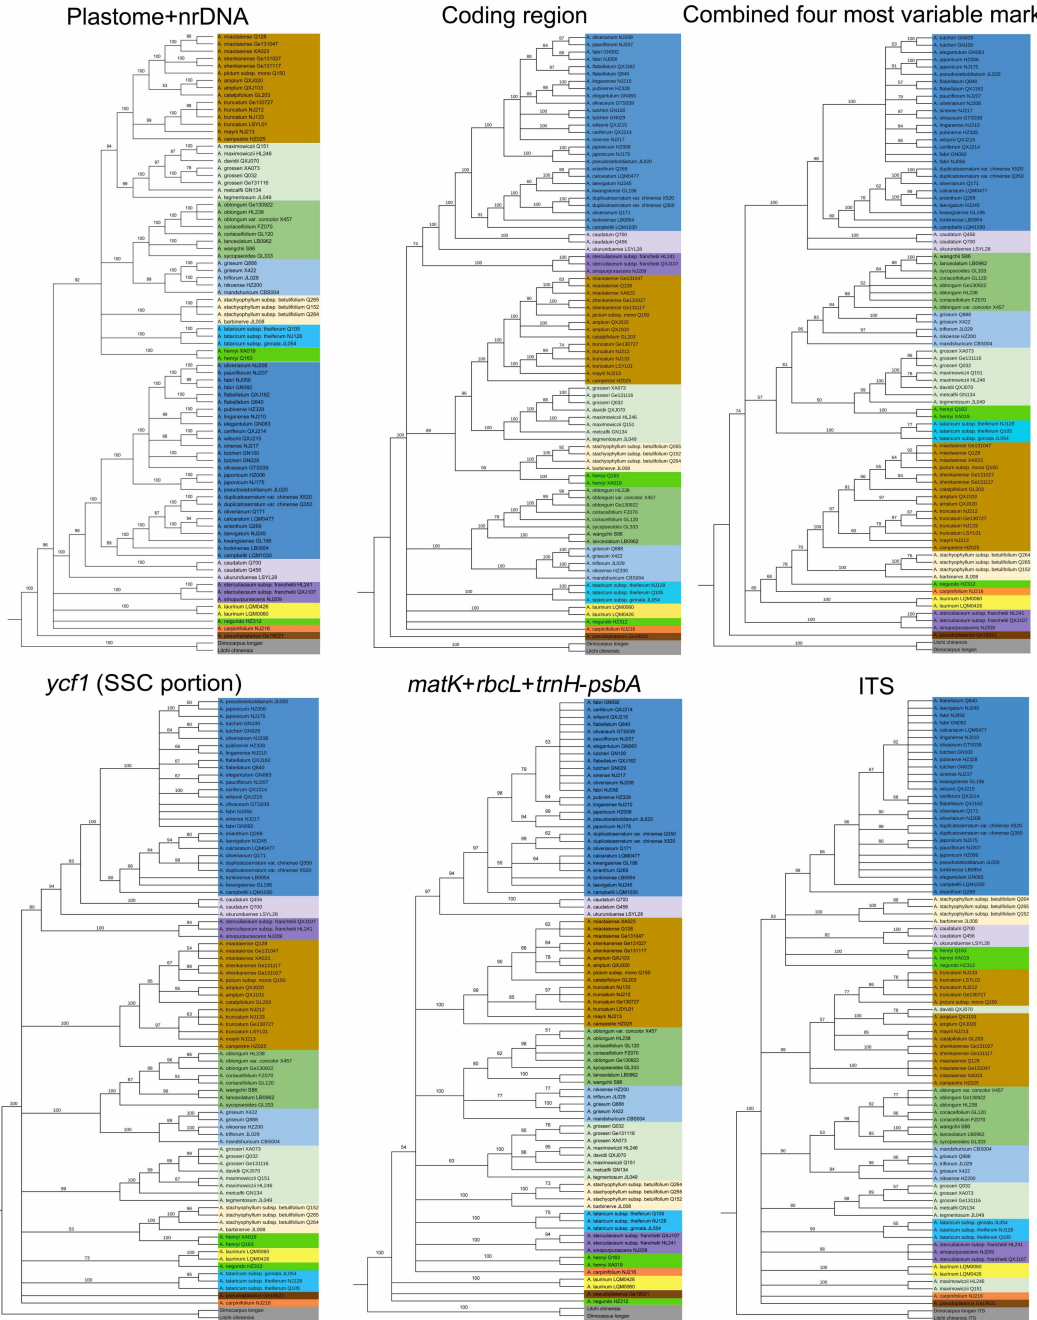

**Fig. S3.** ML trees inferred from different barcoding datasets. ML bootstrap support (BS) values are shown at nodes. Clades were set to polytomy when BS<50%.

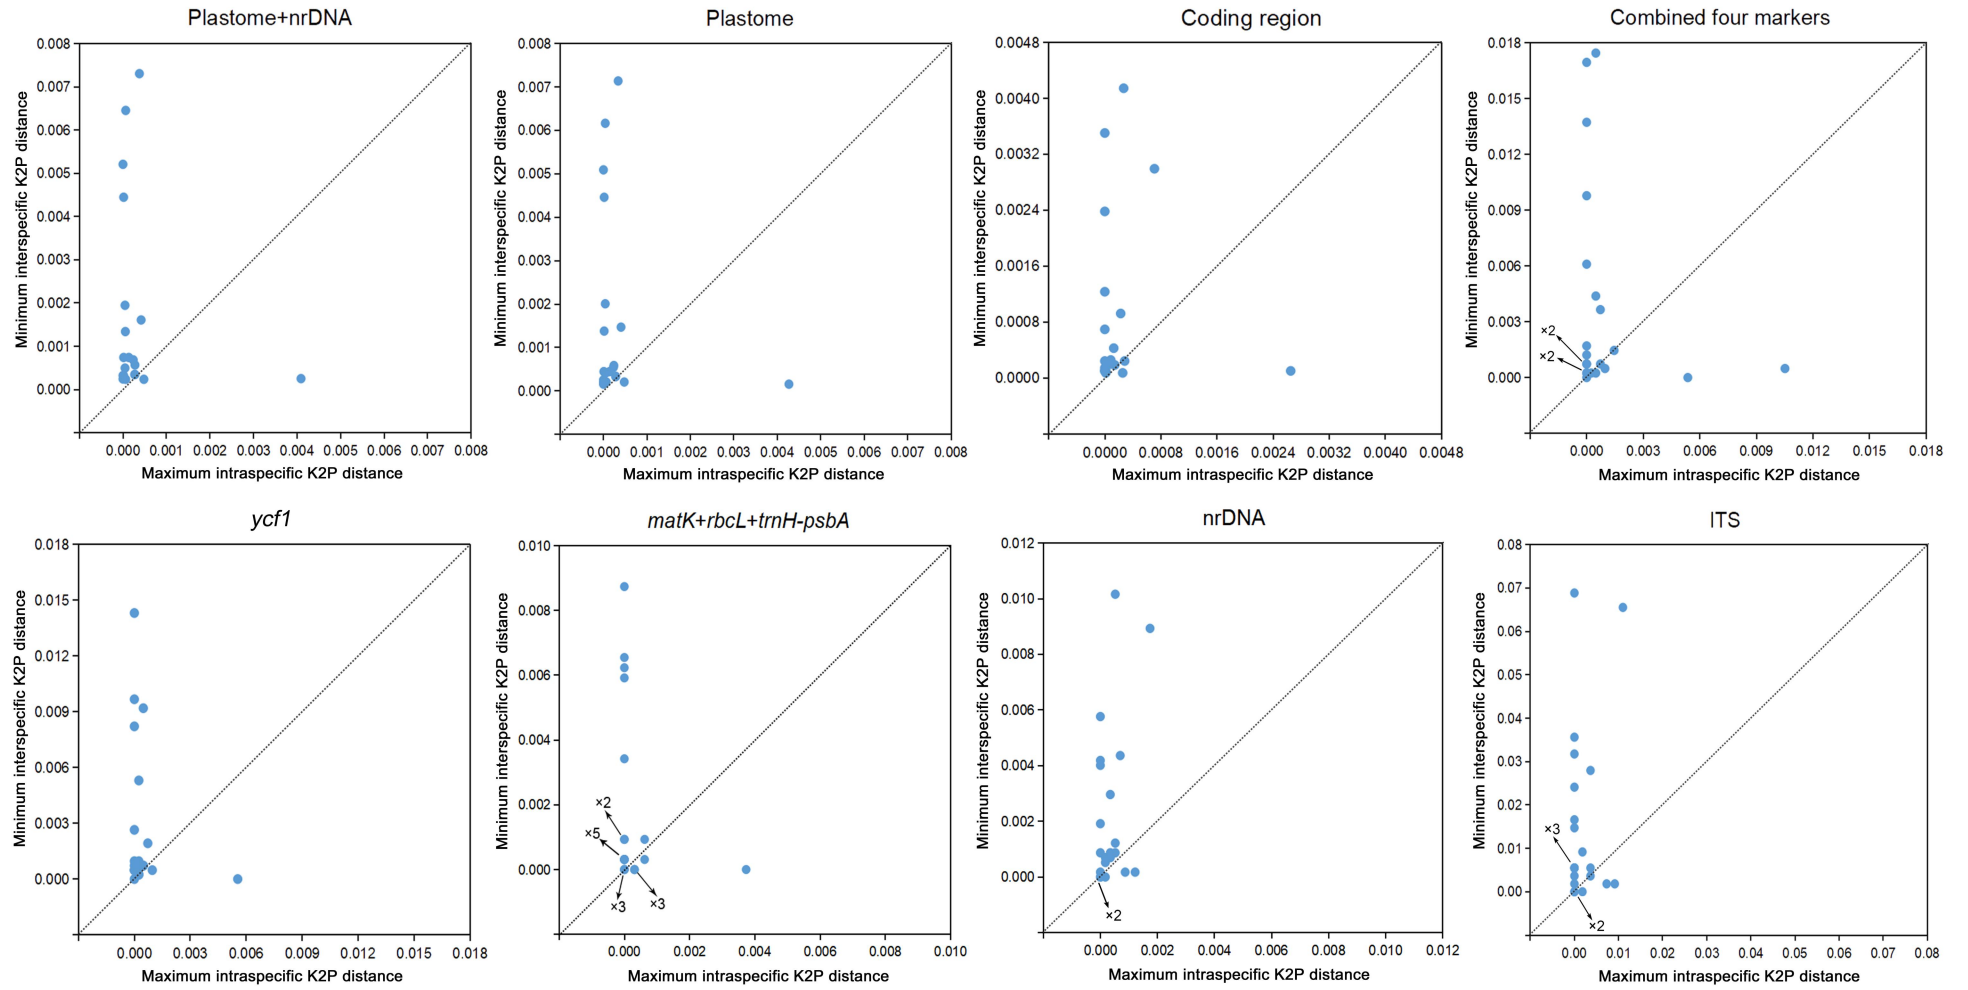

**Fig. S4.** Barcoding gaps of various datasets.

**Fig. S5.** ML tree inferred from the dataset comprised of 267 *Acer* plastomes. Clades were set to polytomy when BS<50%. The individuals of non-monophyletic species were marked with red dots at the end of the branches. Accessions that used for the final phylogenetic analysis were underlined in red.

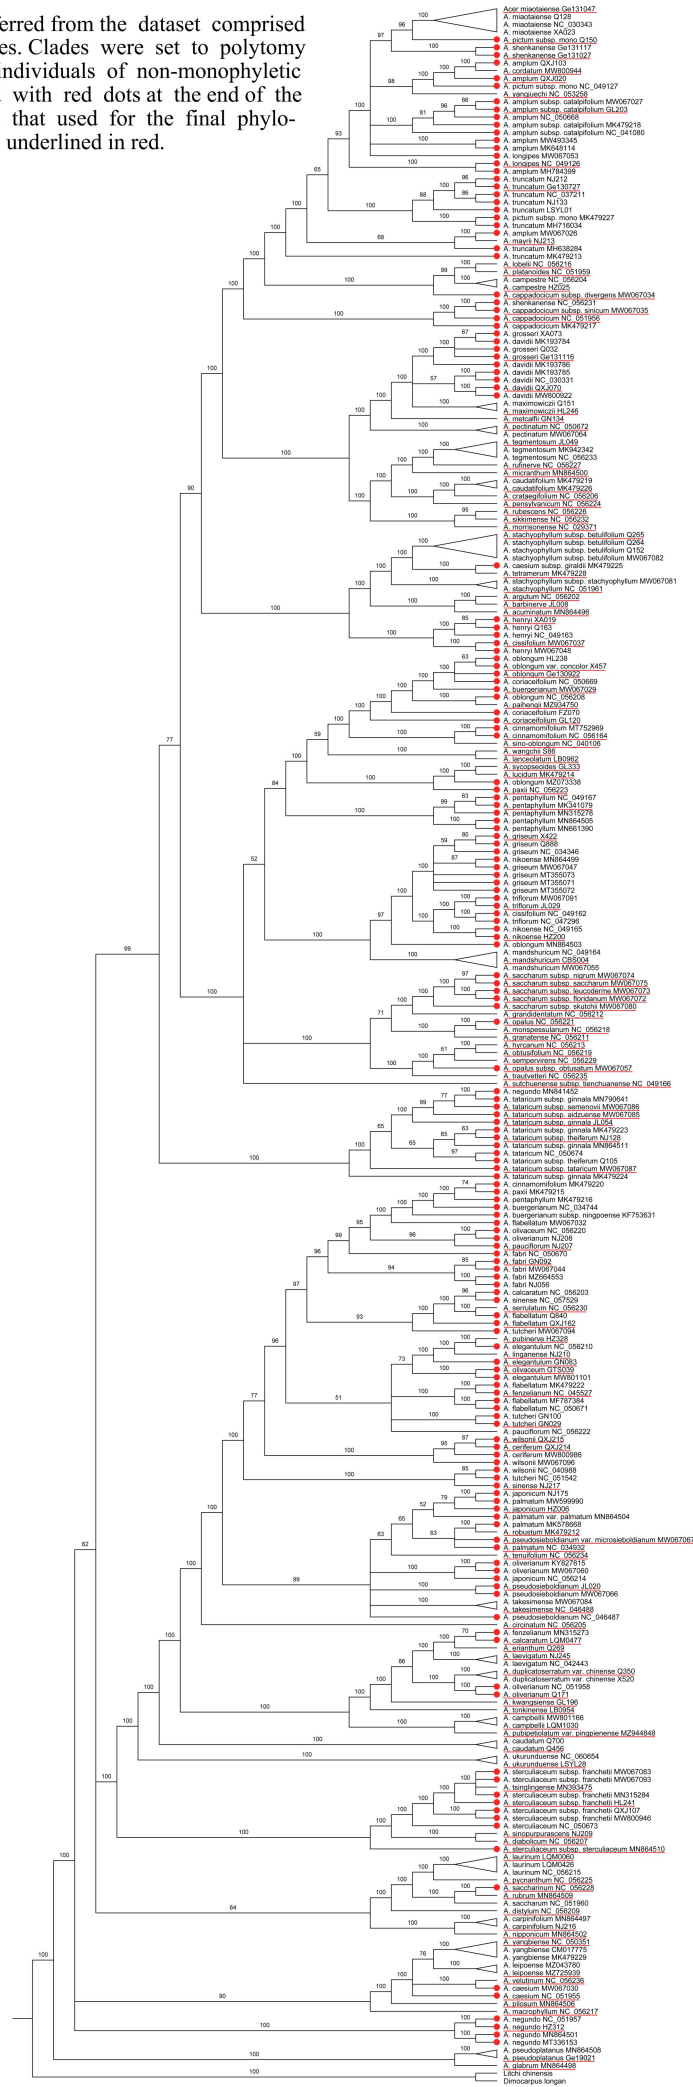

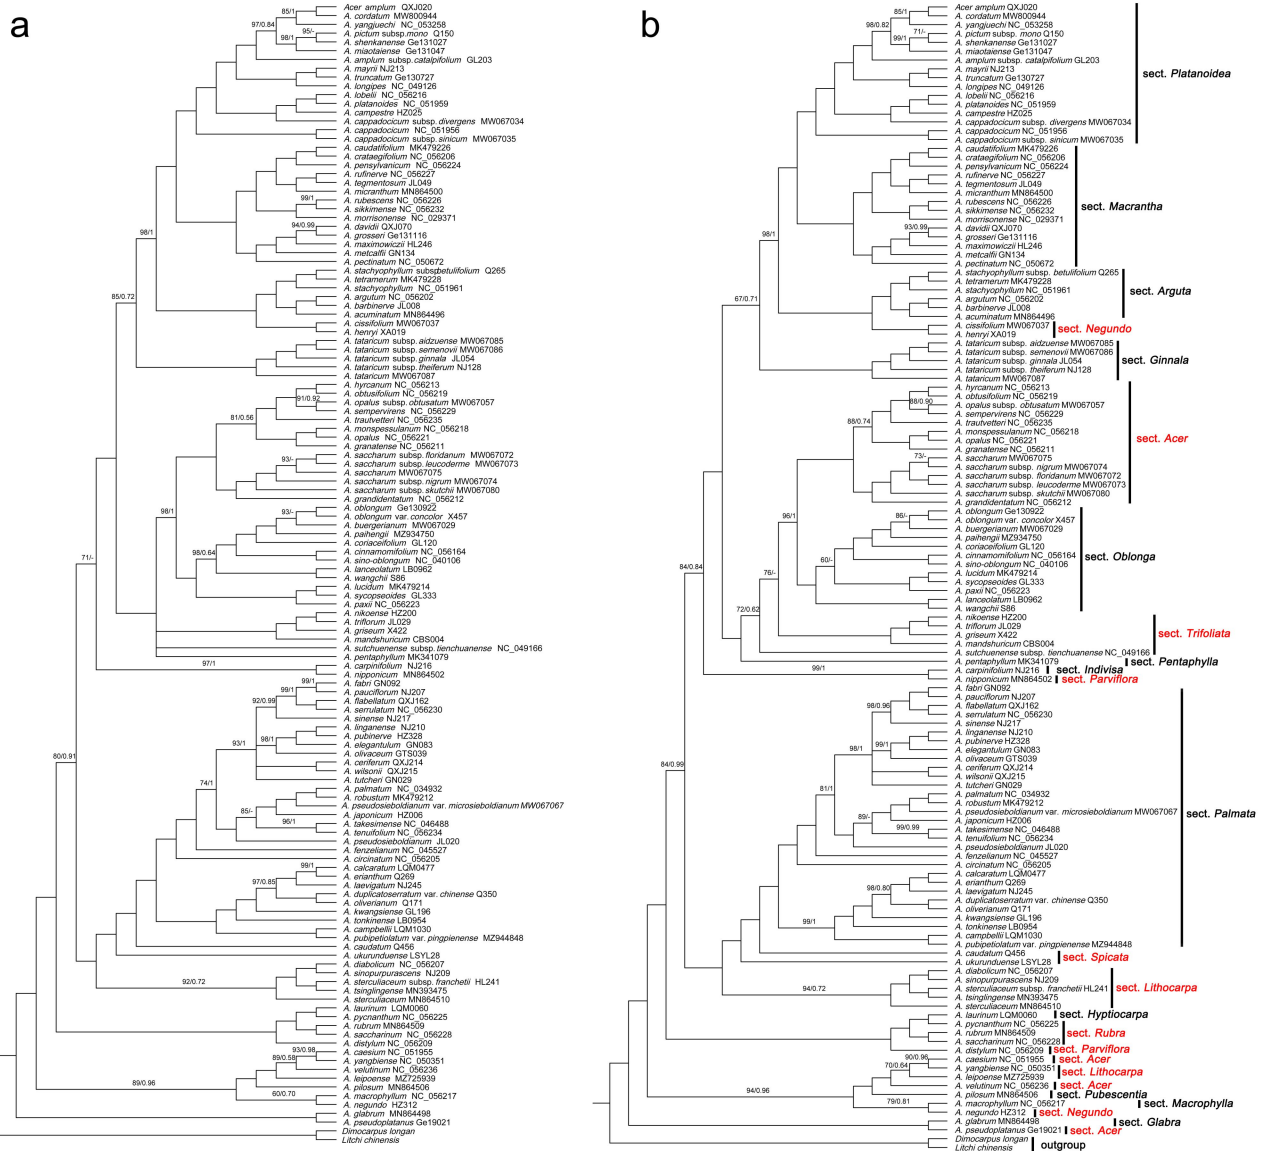

**Fig. S6.** *Acer* phylogenies inferred from partitioned (a) and unpartitioned (b) 80 CDSs dataset. ML bootstrap (BS) values from IQ-TREE and the posterior probabilities (PP) calculated from MrBayes are shown at nodes, except nodes with 100% BS and 1.0 PP, ‘-’ indicates PP under 0.5. Clades were set to polytomy when BS<50%. Non-monophyletic sections are shown in red.

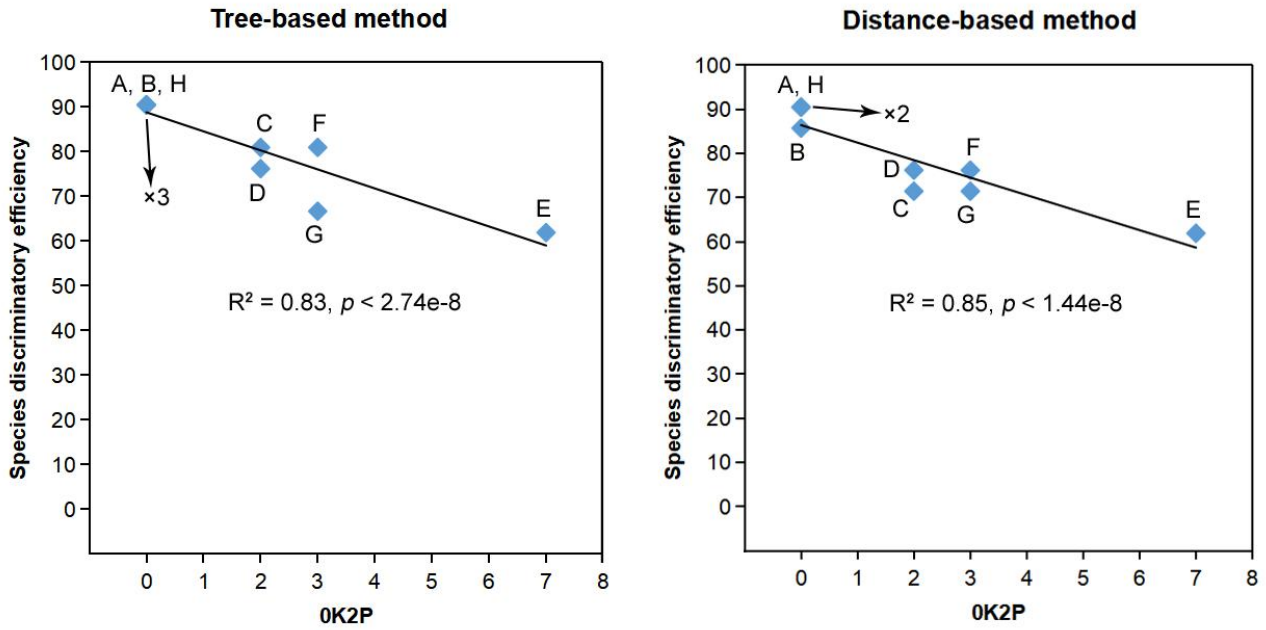

**Fig. S7.** Regression analysis between the species discriminatory efficiency and the OK2P. OK2P: the total number of species (with multiple individuals) that failed to be discriminated due to showing minimum interspecific K2P distance of zero. The dataset codes are shown beside the dots.

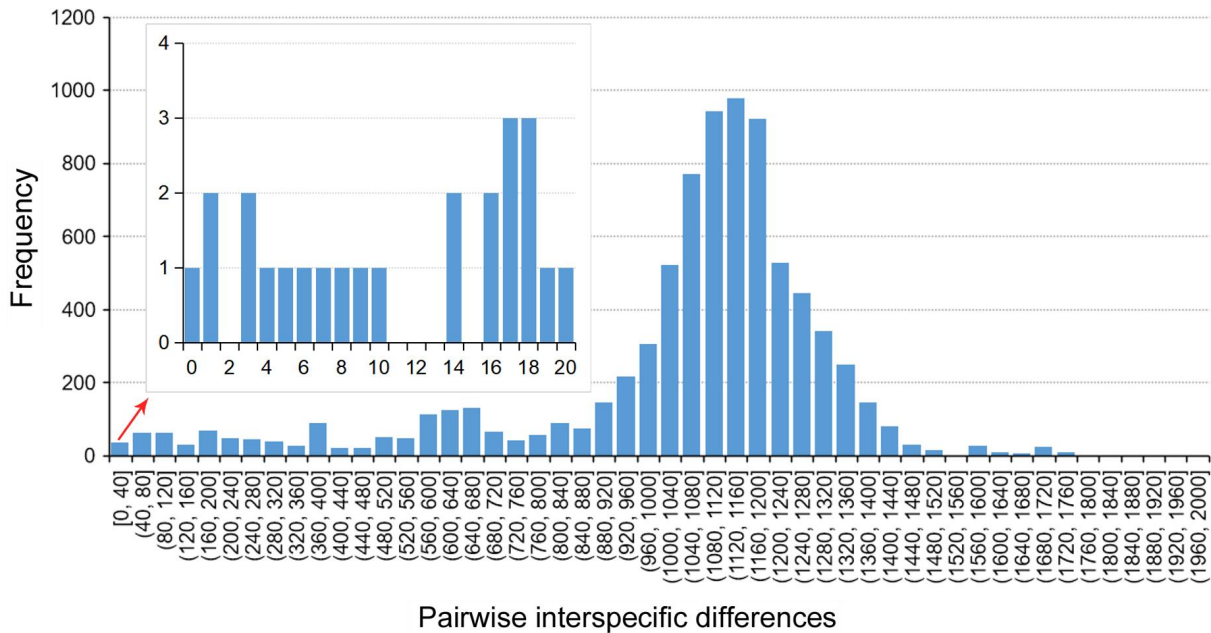

**Fig. S8.** Histogram of the frequency of pairwise interspecific differences for the dataset comprised of 128 *Acer* plastomes (species).

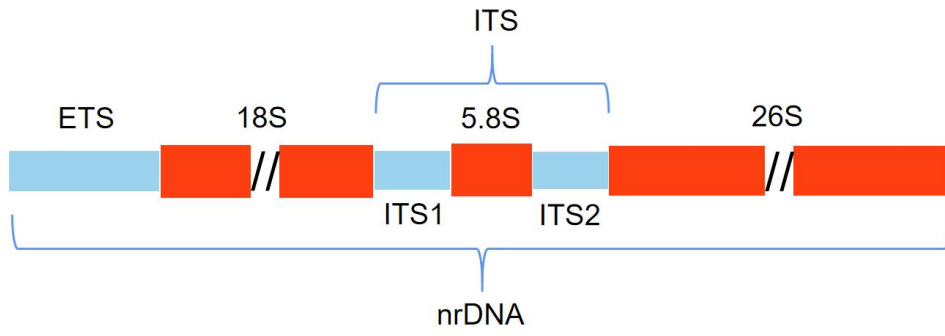

nrDNA: nuclear ribosomal DNA;  
ITS: internal transcribed spacer;  
ETS: external transcribed spacer;

**Fig. S9.** The structure of nrDNA used in this study.



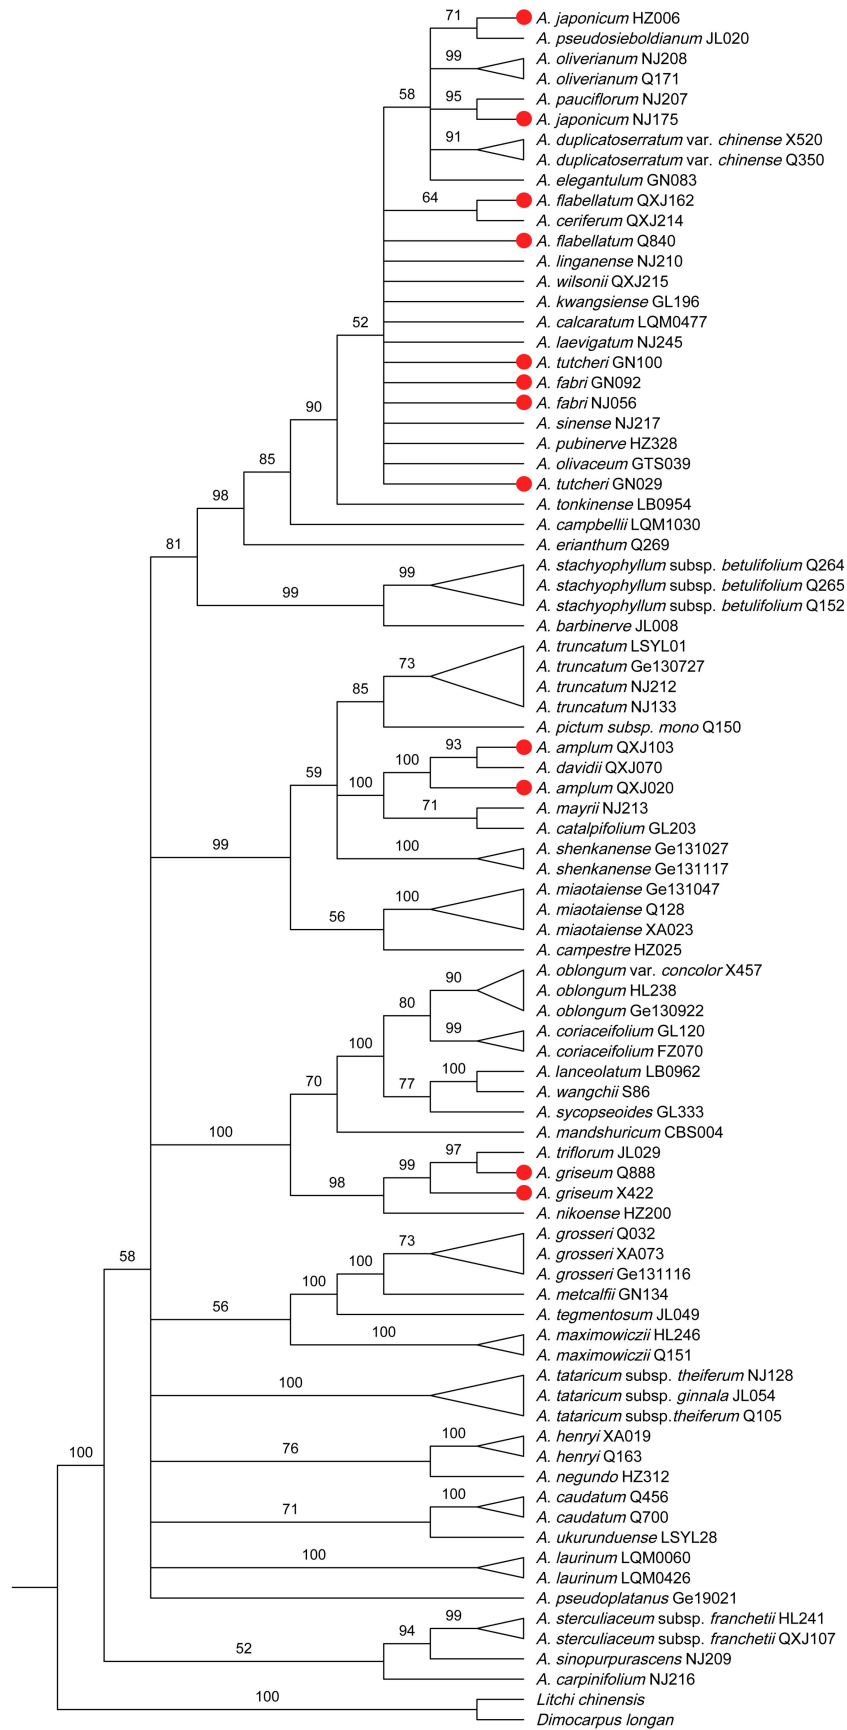

**Fig. S10.** ML tree inferred from the nrDNA dataset without ETS. Clades were set to polytomy when BS<50%. The individuals of non-monophyletic species were marked with red dots at the end of the branches. ETS: external transcribed spacer.

**Table S1.** Major characteristics of *Acer* plastomes generated in this study.

| Species                                          | Section            | DNA accession | Size (bp) | LSC(bp) | SSC(bp) | IR(bp) | GC%   |      |      |      | Number of genes | PCG | tRNA | rRNA |
|--------------------------------------------------|--------------------|---------------|-----------|---------|---------|--------|-------|------|------|------|-----------------|-----|------|------|
|                                                  |                    |               |           |         |         |        | Total | LSC  | SSC  | IR   |                 |     |      |      |
| <i>Acer amplum</i>                               | <i>Platanoidea</i> | QXJ020        | 156,252   | 86,001  | 18,067  | 26,092 | 37.9  | 36.1 | 32.2 | 42.9 | 138             | 89  | 40   | 8    |
| <i>A. amplum</i>                                 | <i>Platanoidea</i> | QXJ103        | 156,247   | 85,996  | 18,067  | 26,092 | 37.9  | 36.1 | 32.2 | 42.9 | 138             | 89  | 40   | 8    |
| <i>A. barbinerve</i>                             | <i>Arguta</i>      | JL008         | 155,985   | 85,774  | 18,057  | 26,077 | 37.9  | 36.0 | 32.1 | 42.9 | 138             | 89  | 40   | 8    |
| <i>A. calcaratum</i>                             | <i>Palmata</i>     | LQM0477       | 156,659   | 85,048  | 18,091  | 26,760 | 37.9  | 36.0 | 32.2 | 42.7 | 139             | 90  | 40   | 8    |
| <i>A. campbellii</i>                             | <i>Palmata</i>     | LQM1030       | 156,815   | 85,204  | 18,125  | 26,743 | 37.9  | 36.1 | 32.1 | 42.8 | 139             | 90  | 40   | 8    |
| <i>A. campestre</i>                              | <i>Platanoidea</i> | HZ025         | 156,314   | 86,009  | 18,107  | 26,099 | 37.9  | 36.0 | 32.1 | 42.9 | 138             | 89  | 40   | 8    |
| <i>A. carpiniifolium</i>                         | <i>Indivisa</i>    | NJ216         | 155,568   | 85,449  | 18,079  | 26,020 | 38.0  | 36.2 | 32.4 | 43.0 | 138             | 89  | 40   | 8    |
| <i>A. catalpifolium</i>                          | <i>Platanoidea</i> | GL203         | 156,424   | 86,178  | 18,066  | 26,090 | 37.9  | 36.0 | 32.2 | 42.9 | 138             | 89  | 40   | 8    |
| <i>A. caudatum</i>                               | <i>Spicata</i>     | Q456          | 156,262   | 84,655  | 18,115  | 26,746 | 37.9  | 36.1 | 32.2 | 42.8 | 139             | 90  | 40   | 8    |
| <i>A. caudatum</i>                               | <i>Spicata</i>     | Q700          | 156,244   | 84,626  | 18,114  | 26,752 | 37.9  | 36.1 | 32.2 | 42.8 | 139             | 90  | 40   | 8    |
| <i>A. ceriferum</i>                              | <i>Palmata</i>     | QXJ214        | 157,029   | 85,356  | 18,167  | 26,753 | 37.9  | 36.0 | 32.3 | 42.8 | 139             | 90  | 40   | 8    |
| <i>A. coriaceifolium</i>                         | <i>Oblonga</i>     | FZ070         | 156,034   | 85,839  | 18,065  | 26,065 | 38.0  | 36.1 | 32.3 | 42.9 | 138             | 89  | 40   | 8    |
| <i>A. coriaceifolium</i>                         | <i>Oblonga</i>     | GL120         | 156,089   | 85,827  | 18,118  | 26,072 | 37.9  | 36.1 | 32.3 | 42.9 | 138             | 89  | 40   | 8    |
| <i>A. davidii</i>                                | <i>Macrantha</i>   | QXJ070        | 155,896   | 85,723  | 17,983  | 26,095 | 38.0  | 36.2 | 32.3 | 42.9 | 138             | 89  | 40   | 8    |
| <i>A. duplicatoserratum</i> var. <i>chinense</i> | <i>Palmata</i>     | Q350          | 156,920   | 85,269  | 18,171  | 26,740 | 37.9  | 36.0 | 32.1 | 42.8 | 139             | 90  | 40   | 8    |
| <i>A. duplicatoserratum</i> var. <i>chinense</i> | <i>Palmata</i>     | X520          | 156,857   | 85,274  | 18,103  | 26,740 | 37.9  | 36.0 | 32.1 | 42.8 | 139             | 90  | 40   | 8    |
| <i>A. elegantulum</i>                            | <i>Palmata</i>     | GN083         | 156,896   | 85,262  | 18,126  | 26,754 | 37.9  | 36.0 | 32.2 | 42.7 | 139             | 90  | 40   | 8    |
| <i>A. erianthum</i>                              | <i>Palmata</i>     | Q269          | 156,571   | 84,984  | 18,085  | 26,751 | 37.9  | 36.1 | 32.2 | 42.8 | 139             | 90  | 40   | 8    |
| <i>A. fabri</i>                                  | <i>Palmata</i>     | GN092         | 156,919   | 85,296  | 18,113  | 26,755 | 37.9  | 36.0 | 32.2 | 42.7 | 139             | 90  | 40   | 8    |
| <i>A. fabri</i>                                  | <i>Palmata</i>     | NJ056         | 156,815   | 85,389  | 18,102  | 26,662 | 37.9  | 36.0 | 32.2 | 42.8 | 139             | 90  | 40   | 8    |
| <i>A. flabellatum</i>                            | <i>Palmata</i>     | Q840          | 156,962   | 85,334  | 18,122  | 26,753 | 37.9  | 36.0 | 32.2 | 42.8 | 139             | 90  | 40   | 8    |
| <i>A. flabellatum</i>                            | <i>Palmata</i>     | QXJ162        | 156,961   | 85,297  | 18,158  | 26,753 | 37.9  | 36.0 | 32.2 | 42.8 | 139             | 90  | 40   | 8    |
| <i>A. griseum</i>                                | <i>Trifoliata</i>  | Q888          | 156,079   | 85,862  | 18,147  | 26,035 | 37.9  | 36.1 | 32.3 | 42.9 | 138             | 89  | 40   | 8    |
| <i>A. griseum</i>                                | <i>Trifoliata</i>  | X422          | 156,079   | 85,862  | 18,147  | 26,035 | 37.9  | 36.1 | 32.3 | 42.9 | 138             | 89  | 40   | 8    |
| <i>A. grosseri</i>                               | <i>Macrantha</i>   | Ge131116      | 155,904   | 85,736  | 17,982  | 26,093 | 38.0  | 36.2 | 32.3 | 42.9 | 138             | 89  | 40   | 8    |
| <i>A. grosseri</i>                               | <i>Macrantha</i>   | Q032          | 155,904   | 85,736  | 17,982  | 26,093 | 38.0  | 36.2 | 32.3 | 42.9 | 138             | 89  | 40   | 8    |
| <i>A. grosseri</i>                               | <i>Macrantha</i>   | XA073         | 155,897   | 85,729  | 17,982  | 26,093 | 38.0  | 36.2 | 32.3 | 42.9 | 138             | 89  | 40   | 8    |
| <i>A. henryi</i>                                 | <i>Negundo</i>     | Q163          | 156,328   | 86,061  | 18,071  | 26,098 | 37.9  | 36.0 | 32.2 | 42.9 | 138             | 89  | 40   | 8    |
| <i>A. henryi</i>                                 | <i>Negundo</i>     | XA019         | 156,352   | 86,060  | 18,096  | 26,098 | 37.9  | 36.0 | 32.2 | 42.9 | 138             | 89  | 40   | 8    |
| <i>A. japonicum</i>                              | <i>Palmata</i>     | NJ175         | 156,958   | 85,306  | 18,140  | 26,756 | 37.9  | 36.0 | 32.2 | 42.8 | 139             | 90  | 40   | 8    |
| <i>A. japonicum</i>                              | <i>Palmata</i>     | HZ006         | 157,017   | 85,363  | 18,142  | 26,756 | 37.9  | 36.0 | 32.2 | 42.8 | 139             | 90  | 40   | 8    |

**Table S1. (continued)**

| Species                                             | Section            | DNA accession | Size (bp) | LSC(bp) | SSC(bp) | IR(bp) | GC%   |      |      |      | Number of genes | PCG | tRNA | rRNA |
|-----------------------------------------------------|--------------------|---------------|-----------|---------|---------|--------|-------|------|------|------|-----------------|-----|------|------|
|                                                     |                    |               |           |         |         |        | Total | LSC  | SSC  | IR   |                 |     |      |      |
| <i>A. kwangnanense</i>                              | <i>Oblonga</i>     | LB0962        | 155,727   | 85,541  | 18,074  | 26,056 | 38.0  | 36.2 | 32.3 | 42.9 | 138             | 89  | 40   | 8    |
| <i>A. kwangsiense</i>                               | <i>Palmata</i>     | GL196         | 156,789   | 85,234  | 18,077  | 26,739 | 37.9  | 36.0 | 32.2 | 42.8 | 139             | 90  | 40   | 8    |
| <i>A. laevigatum</i>                                | <i>Palmata</i>     | NJ245         | 156,552   | 84,957  | 18,115  | 26,740 | 37.9  | 36.1 | 32.2 | 42.8 | 139             | 90  | 40   | 8    |
| <i>A. laurinum</i>                                  | <i>Hyptiocarpa</i> | LQM0060       | 156,004   | 85,786  | 18,052  | 26,083 | 37.9  | 36.0 | 32.2 | 42.9 | 138             | 89  | 40   | 8    |
| <i>A. laurinum</i>                                  | <i>Hyptiocarpa</i> | LQM0426       | 156,013   | 85,795  | 18,052  | 26,083 | 37.9  | 36.0 | 32.2 | 42.9 | 138             | 89  | 40   | 8    |
| <i>A. linganense</i>                                | <i>Palmata</i>     | NJ210         | 156,918   | 85,287  | 18,123  | 26,754 | 37.9  | 36.0 | 32.2 | 42.7 | 139             | 90  | 40   | 8    |
| <i>A. mandshuricum</i>                              | <i>Trifoliata</i>  | CBS004        | 156,250   | 86,058  | 18,058  | 26,067 | 37.9  | 36.0 | 32.3 | 42.9 | 138             | 89  | 40   | 8    |
| <i>A. maximowiczii</i>                              | <i>Macrantha</i>   | HL246         | 156,105   | 85,763  | 17,962  | 26,190 | 38.0  | 36.2 | 32.3 | 43.0 | 140             | 89  | 42   | 8    |
| <i>A. maximowiczii</i>                              | <i>Macrantha</i>   | Q151          | 155,986   | 85,798  | 17,988  | 26,100 | 38.0  | 36.2 | 32.3 | 42.9 | 138             | 89  | 40   | 8    |
| <i>A. mayrii</i>                                    | <i>Platanoidea</i> | NJ213         | 156,238   | 85,991  | 18,067  | 26,090 | 37.9  | 36.1 | 32.2 | 42.9 | 138             | 89  | 40   | 8    |
| <i>A. metcalftii</i>                                | <i>Macrantha</i>   | GN134         | 155,769   | 85,618  | 17,983  | 26,084 | 38.0  | 36.2 | 32.3 | 42.9 | 138             | 89  | 40   | 8    |
| <i>A. miaotaiense</i>                               | <i>Platanoidea</i> | Ge131047      | 156,243   | 85,991  | 18,068  | 26,092 | 37.9  | 36.1 | 32.2 | 42.9 | 138             | 89  | 40   | 8    |
| <i>A. miaotaiense</i>                               | <i>Platanoidea</i> | Q128          | 156,243   | 85,991  | 18,068  | 26,092 | 37.9  | 36.1 | 32.2 | 42.9 | 138             | 89  | 40   | 8    |
| <i>A. miaotaiense</i>                               | <i>Platanoidea</i> | XA023         | 156,241   | 85,989  | 18,068  | 26,092 | 37.9  | 36.1 | 32.2 | 42.9 | 138             | 89  | 40   | 8    |
| <i>A. negundo</i>                                   | <i>Negundo</i>     | HZ312         | 155,916   | 85,657  | 18,091  | 26,084 | 37.9  | 36.1 | 32.3 | 42.9 | 138             | 89  | 40   | 8    |
| <i>A. nikoense</i>                                  | <i>Trifoliata</i>  | HZ200         | 156,096   | 85,888  | 18,050  | 26,079 | 37.9  | 36.0 | 32.4 | 42.9 | 138             | 89  | 40   | 8    |
| <i>A. oblongum</i>                                  | <i>Oblonga</i>     | Ge130922      | 155,947   | 85,777  | 18,042  | 26,064 | 38.0  | 36.1 | 32.3 | 42.9 | 138             | 89  | 40   | 8    |
| <i>A. oblongum</i>                                  | <i>Oblonga</i>     | HL238         | 155,959   | 85,789  | 18,042  | 26,064 | 38.0  | 36.1 | 32.3 | 42.9 | 138             | 89  | 40   | 8    |
| <i>A. oblongum</i> var. <i>concolor</i>             | <i>Oblonga</i>     | X457          | 155,915   | 85,744  | 18,043  | 26,064 | 38.0  | 36.1 | 32.3 | 42.9 | 138             | 89  | 40   | 8    |
| <i>A. olivaceum</i>                                 | <i>Palmata</i>     | GTS039        | 156,716   | 85,061  | 18,149  | 26,753 | 37.9  | 36.0 | 32.2 | 42.8 | 139             | 90  | 40   | 8    |
| <i>A. oliverianum</i>                               | <i>Palmata</i>     | NJ208         | 156,799   | 85,191  | 18,098  | 26,755 | 37.9  | 36.0 | 32.2 | 42.7 | 139             | 90  | 40   | 8    |
| <i>A. oliverianum</i>                               | <i>Palmata</i>     | Q171          | 156,890   | 85,275  | 18,135  | 26,740 | 37.9  | 36.0 | 32.1 | 42.8 | 139             | 90  | 40   | 8    |
| <i>A. pauciflorum</i>                               | <i>Palmata</i>     | NJ207         | 157,008   | 85,397  | 18,107  | 26,752 | 37.9  | 36.0 | 32.2 | 42.8 | 139             | 90  | 40   | 8    |
| <i>A. pictum</i> subsp. <i>mono</i>                 | <i>Platanoidea</i> | Q150          | 156,247   | 85,967  | 18,094  | 26,093 | 37.9  | 36.1 | 32.2 | 42.9 | 138             | 89  | 40   | 8    |
| <i>A. pseudoplatanus</i>                            | <i>Acer</i>        | Ge19021       | 155,816   | 85,690  | 17,960  | 26,083 | 37.9  | 36.1 | 32.2 | 42.9 | 138             | 89  | 40   | 8    |
| <i>A. pseudosieboldianum</i>                        | <i>Palmata</i>     | JL020         | 157,014   | 85,391  | 18,143  | 26,740 | 37.9  | 36.0 | 32.2 | 42.8 | 139             | 90  | 40   | 8    |
| <i>A. pubinerve</i>                                 | <i>Palmata</i>     | HZ328         | 156,869   | 85,239  | 18,120  | 26,755 | 37.9  | 36.0 | 32.2 | 42.7 | 139             | 90  | 40   | 8    |
| <i>A. shenkanense</i>                               | <i>Platanoidea</i> | Ge131027      | 156,163   | 85,923  | 18,058  | 26,091 | 37.9  | 36.1 | 32.2 | 42.9 | 138             | 89  | 40   | 8    |
| <i>A. shenkanense</i>                               | <i>Platanoidea</i> | Ge131117      | 156,167   | 85,924  | 18,059  | 26,092 | 37.9  | 36.1 | 32.2 | 42.9 | 138             | 89  | 40   | 8    |
| <i>A. sinense</i>                                   | <i>Palmata</i>     | NJ217         | 156,949   | 85,338  | 18,105  | 26,753 | 37.9  | 36.0 | 32.2 | 42.8 | 139             | 90  | 40   | 8    |
| <i>A. sinopurpurascens</i>                          | <i>Lithocarpa</i>  | NJ209         | 156,059   | 85,797  | 18,110  | 26,076 | 38.0  | 36.2 | 32.4 | 43.0 | 138             | 89  | 40   | 8    |
| <i>A. stachyophyllum</i> subsp. <i>betulifolium</i> | <i>Arguta</i>      | Q152          | 156,118   | 85,860  | 18,096  | 26,081 | 37.9  | 36.0 | 32.1 | 42.9 | 138             | 89  | 40   | 8    |
| <i>A. stachyophyllum</i> subsp. <i>betulifolium</i> | <i>Arguta</i>      | Q264          | 155,980   | 85,747  | 18,065  | 26,084 | 37.9  | 36.0 | 32.1 | 42.9 | 138             | 89  | 40   | 8    |
| <i>A. stachyophyllum</i> subsp. <i>betulifolium</i> | <i>Arguta</i>      | Q265          | 156,108   | 85,873  | 18,073  | 26,081 | 37.9  | 36.0 | 32.1 | 42.9 | 138             | 89  | 40   | 8    |

**Table S1. (continued)**

| Species                                          | Section            | DNA accession | Size (bp) | LSC(bp) | SSC(bp) | IR(bp) | GC%   |      |      | Number of genes | PCG | tRNA | rRNA |    |
|--------------------------------------------------|--------------------|---------------|-----------|---------|---------|--------|-------|------|------|-----------------|-----|------|------|----|
|                                                  |                    |               |           |         |         |        | Total | LSC  | SSC  |                 |     |      |      | IR |
| <i>A. sterculiaceum</i> subsp. <i>franchetii</i> | <i>Lithocarpa</i>  | HL241         | 156,032   | 85,755  | 18,137  | 26,070 | 38.0  | 36.2 | 32.4 | 42.9            | 138 | 89   | 40   | 8  |
| <i>A. sterculiaceum</i> subsp. <i>franchetii</i> | <i>Lithocarpa</i>  | QXJ107        | 156,187   | 85,888  | 18,145  | 26,077 | 38.0  | 36.2 | 32.4 | 42.9            | 138 | 89   | 40   | 8  |
| <i>A. sycopseoides</i>                           | <i>Oblonga</i>     | GL333         | 156,101   | 85,875  | 18,090  | 26,068 | 38.0  | 36.1 | 32.3 | 42.9            | 138 | 89   | 40   | 8  |
| <i>A. tataricum</i> subsp. <i>ginnala</i>        | <i>Ginnala</i>     | JL054         | 155,595   | 85,369  | 18,042  | 26,092 | 38.0  | 36.2 | 32.4 | 42.9            | 138 | 89   | 40   | 8  |
| <i>A. tataricum</i> subsp. <i>theiferum</i>      | <i>Ginnala</i>     | NJ128         | 155,625   | 85,382  | 18,041  | 26,101 | 38.0  | 36.3 | 32.4 | 42.9            | 138 | 89   | 40   | 8  |
| <i>A. tataricum</i> subsp. <i>theiferum</i>      | <i>Ginnala</i>     | Q105          | 155,602   | 85,354  | 18,052  | 26,098 | 38.0  | 36.3 | 32.4 | 42.9            | 138 | 89   | 40   | 8  |
| <i>A. tegmentosum</i>                            | <i>Macrantha</i>   | JL049         | 156,512   | 86,164  | 18,104  | 26,122 | 37.9  | 36.0 | 32.2 | 42.9            | 138 | 89   | 40   | 8  |
| <i>A. tonkinense</i>                             | <i>Lithocarpa</i>  | LB0954        | 156,743   | 85,254  | 18,047  | 26,721 | 37.9  | 36.0 | 32.2 | 42.8            | 139 | 90   | 40   | 8  |
| <i>A. triflorum</i>                              | <i>Trifoliata</i>  | JL029         | 155,808   | 85,597  | 18,053  | 26,079 | 37.9  | 36.0 | 32.3 | 42.9            | 138 | 89   | 40   | 8  |
| <i>A. truncatum</i>                              | <i>Platanoidea</i> | Ge130727      | 156,261   | 86,014  | 18,071  | 26,088 | 37.9  | 36.0 | 32.2 | 42.9            | 138 | 89   | 40   | 8  |
| <i>A. truncatum</i>                              | <i>Platanoidea</i> | LSYL01        | 156,225   | 85,980  | 18,069  | 26,088 | 37.9  | 36.1 | 32.2 | 42.9            | 138 | 89   | 40   | 8  |
| <i>A. truncatum</i>                              | <i>Platanoidea</i> | NJ133         | 156,261   | 86,014  | 18,071  | 26,088 | 37.9  | 36.0 | 32.2 | 42.9            | 138 | 89   | 40   | 8  |
| <i>A. truncatum</i>                              | <i>Platanoidea</i> | NJ212         | 156,261   | 86,014  | 18,071  | 26,088 | 37.9  | 36.0 | 32.2 | 42.9            | 138 | 89   | 40   | 8  |
| <i>A. tutcheri</i>                               | <i>Palmata</i>     | GN100         | 157,291   | 85,339  | 18,386  | 26,783 | 37.9  | 36.0 | 32.2 | 42.7            | 139 | 90   | 40   | 8  |
| <i>A. tutcheri</i>                               | <i>Palmata</i>     | GN029         | 157,267   | 85,339  | 18,362  | 26,783 | 37.9  | 36.0 | 32.2 | 42.7            | 139 | 90   | 40   | 8  |
| <i>A. ukurunduense</i>                           | <i>Spicata</i>     | LSYL28        | 156,539   | 85,060  | 18,009  | 26,735 | 37.9  | 36.1 | 32.2 | 42.8            | 139 | 90   | 40   | 8  |
| <i>A. wangchii</i>                               | <i>Palmata</i>     | S86           | 155,852   | 85,650  | 18,090  | 26,056 | 38.0  | 36.1 | 32.2 | 42.9            | 138 | 89   | 40   | 8  |
| <i>A. wilsonii</i>                               | <i>Palmata</i>     | QXJ215        | 157,002   | 85,329  | 18,167  | 26,753 | 37.9  | 36.0 | 32.3 | 42.8            | 139 | 90   | 40   | 8  |

**Table S2.** List of genes present in *Acer* plastomes generated in this study.

| Group of gene                     | Genes name                                                                                                                                                                                                                                                                                                                                                                                                          | Amount        |
|-----------------------------------|---------------------------------------------------------------------------------------------------------------------------------------------------------------------------------------------------------------------------------------------------------------------------------------------------------------------------------------------------------------------------------------------------------------------|---------------|
| Photosystem I                     | <i>psaA, psaB, psaC, psaI, psaJ</i>                                                                                                                                                                                                                                                                                                                                                                                 | 5             |
| Photosystem II                    | <i>psbA, psbB, psbC, psbD, psbE, psbF, psbH, psbI, psbJ, psbK, psbL, psbM, psbN, psbT, psbZ</i>                                                                                                                                                                                                                                                                                                                     | 15            |
| Photosystem assembly factors      | <i>ycf3**, ycf4</i>                                                                                                                                                                                                                                                                                                                                                                                                 | 2             |
| Cytochrome b/f complex            | <i>petA, petB*, petD*, petG, petL, petN</i>                                                                                                                                                                                                                                                                                                                                                                         | 6             |
| ATP synthase complex              | <i>atpA, atpB, atpE, atpF*, atpH, atpI</i>                                                                                                                                                                                                                                                                                                                                                                          | 6             |
| NADH dehydrogenase complex        | <i>ndhA*, ndhB* (×2), ndhC, ndhD, ndhE, ndhF, ndhG, ndhH, ndhI, ndhJ, ndhK</i>                                                                                                                                                                                                                                                                                                                                      | 12            |
| Large subunit of RuBisCO          | <i>rbcL</i>                                                                                                                                                                                                                                                                                                                                                                                                         | 1             |
| Maturase                          | <i>matK</i>                                                                                                                                                                                                                                                                                                                                                                                                         | 1             |
| RNA polymerase subunits           | <i>rpoA, rpoB, rpoC1*, rpoC2</i>                                                                                                                                                                                                                                                                                                                                                                                    | 4             |
| Small subunit ribosomal proteins  | <i>rps2, rps3, rps4, rps7 (×2), rps8, rps11, rps12* (×2), rps14, rps15, rps16*, rps18, rps19 (×2 in sect. Palmata and sect. Spicata)</i>                                                                                                                                                                                                                                                                            | 14 (15)       |
| Large subunit ribosomal proteins  | <i>rpl2* (×2), rpl14, rpl16*, rpl20, rpl22, rpl23 (×2), rpl32, rpl33, rpl36</i>                                                                                                                                                                                                                                                                                                                                     | 11            |
| Subunit of acetyl-CoA-carboxylase | <i>accD</i>                                                                                                                                                                                                                                                                                                                                                                                                         | 1             |
| Subunit of Clp-protease           | <i>clpP**</i>                                                                                                                                                                                                                                                                                                                                                                                                       | 1             |
| Translation initiation factor     | <i>infA Ψ</i>                                                                                                                                                                                                                                                                                                                                                                                                       | 1             |
| Inner envelope membrane protein   | <i>cemA</i>                                                                                                                                                                                                                                                                                                                                                                                                         | 1             |
| Cytochrome c biogenesis protein   | <i>ccsA</i>                                                                                                                                                                                                                                                                                                                                                                                                         | 1             |
| Genes of unknown function         | <i>orf42 (×2), ycf1, ycf1a, ycf2 (×2), ycf15 (×2)</i>                                                                                                                                                                                                                                                                                                                                                               | 8             |
| Ribosomal RNAs                    | <i>rrn4.5 (×2), rrn5 (×2), rrn16 (×2), rrn23 (×2)</i>                                                                                                                                                                                                                                                                                                                                                               | 8             |
| Transfer RNAs                     | <i>trnA-UGC* (×2), trnC-GCA, trnD-GUC, trnE-UUC, trnF-GAA, trnM-CAU, trnG-GCC, trnG-UCC*, trnH-GUG, trnI-CAU (×2), trnI-GAU* (×2), trnK-UUU*, trnL-CAA (×2), trnL-UAA*, trnL-UAG, trnM-CAU (×2), trnN-GUU (×2), trnP-GGG, trnP-UGG, trnQ-UUG, trnR-ACG (×2) (×4 in <i>A. maximowiczii</i> HL246), trnR-UCU, trnS-GCU, trnS-GGA, trnS-UGA, trnT-GGU (×2), trnT-UGU, trnV-GAC (×2), trnV-UAC*, trnW-CCA, trnY-GUA</i> | 40 (42)       |
| Total                             |                                                                                                                                                                                                                                                                                                                                                                                                                     | 138 (139/140) |

**Note:** Genes marked with one asterisk (\*) contain one intron; two asterisk (\*) represent double introns. *Ycf1a* is the fragment of *ycf1*.

**Table S3.** Characteristic statistics of five hypervariable regions.

| Regions                             | Aligned length (bp) | Variable sites |       | PI sites |      | Pi      | Haplotypes | No. of indels |
|-------------------------------------|---------------------|----------------|-------|----------|------|---------|------------|---------------|
|                                     |                     | Number         | %     | Number   | %    |         |            |               |
| <i>trnK</i> -UUU— <i>rps16</i>      | 1,256               | 132            | 10.51 | 90       | 7.17 | 0.01933 | 43         | 97            |
| <i>trnS</i> -UGA— <i>trnfM</i> -CAU | 1,675               | 136            | 8.12  | 92       | 5.49 | 0.01889 | 44         | 71            |
| <i>ndhC</i> — <i>trnV</i> -UAC      | 1,040               | 79             | 7.60  | 60       | 5.77 | 0.02339 | 35         | 62            |
| <i>ndhF</i> — <i>trnL</i> -UAG      | 2,540               | 282            | 11.10 | 191      | 7.52 | 0.02265 | 58         | 170           |
| <i>ycf1</i> (SSC portion)           | 4,359               | 513            | 11.77 | 291      | 6.68 | 0.01331 | 63         | 24            |

**Note:** Pi: Nucleotide diversity; PI sites: Parsimony informative sites

**Table S4.** Species pairs that with interspecific differences below 10.

| <b>Species 1</b>                                        | <b>Species 2</b>                                      | <b>Difference</b> |
|---------------------------------------------------------|-------------------------------------------------------|-------------------|
| <i>Acer saccharum</i> subsp. <i>floridanum</i> MW067072 | <i>A. saccharum</i> subsp. <i>leucoderme</i> MW067073 | 0                 |
| <i>A. tataricum</i> subsp. <i>aidzuense</i> MW067085    | <i>A. tataricum</i> subsp. <i>semenovii</i> MW067086  | 1                 |
| <i>A. argutum</i> NC_056202                             | <i>A. barbinerve</i> JL008                            | 1                 |
| <i>A. sterculiaceum</i> subsp. <i>franchetii</i> HL241  | <i>A. tsinglingense</i> MN393475                      | 3                 |
| <i>A. ceriferum</i> QXJ214                              | <i>A. wilsonii</i> QXJ215                             | 3                 |
| <i>A. tataricum</i> subsp. <i>ginnala</i> JL054         | <i>A. tataricum</i> subsp. <i>semenovii</i> MW067086  | 4                 |
| <i>A. tataricum</i> subsp. <i>aidzuense</i> MW067085    | <i>A. tataricum</i> subsp. <i>ginnala</i> JL054       | 5                 |
| <i>A. monspessulanum</i> NC_056218                      | <i>A. opalus</i> NC_056221                            | 6                 |
| <i>A. amplum</i> QXJ020                                 | <i>A. cordatum</i> MW800944                           | 7                 |
| <i>A. rubescens</i> NC_056226                           | <i>A. sikkimense</i> NC_056232                        | 8                 |
| <i>A. oblongum</i> Ge130922                             | <i>A. oblongum</i> var. <i>concolor</i> X457          | 9                 |

**Table S5.** Collection information of *Acer* plant materials.

| Species                                                                         | Section            | Locality                                       | Sample ID | Voucher specimen | Collector         |
|---------------------------------------------------------------------------------|--------------------|------------------------------------------------|-----------|------------------|-------------------|
| <i>Acer pseudoplatanus</i> L.                                                   | <i>Acer</i>        | Ringve Bot. Garden, Trondreim, Norway          | Ge19021   | Ge19021          | X.J. Ge           |
| <i>A. barbinerve</i> Maxim. ex Miq.                                             | <i>Arguta</i>      | Changbai mountain, Jilin, China                | JL008     | CBS018           | J. Ye             |
| <i>A. stachyophyllum</i> subsp. <i>betulifolium</i> (Maxim.) P.C. de Jong       | <i>Arguta</i>      | Baoji, Shaanxi, China                          | Q152      | Q152             | S.L. Dong         |
| <i>A. stachyophyllum</i> subsp. <i>betulifolium</i> (Maxim.) P.C. de Jong       | <i>Arguta</i>      | Baoji, Shaanxi, China                          | Q264      | Q264             | S.L. Dong         |
| <i>A. stachyophyllum</i> subsp. <i>betulifolium</i> (Maxim.) P.C. de Jong       | <i>Arguta</i>      | Baoji, Shaanxi, China                          | Q265      | Q265             | S.L. Dong         |
| <i>A. tataricum</i> subsp. <i>ginnala</i> (Maxim.) Wesm.                        | <i>Ginnala</i>     | Changbai mountain, Jilin, China                | JL054     | CBS008           | J. Ye             |
| <i>A. tataricum</i> subsp. <i>theiferum</i> (W.P.Fang) Y.S. Chen & P.C. de Jong | <i>Ginnala</i>     | Zhongshan Bot. Garden, Nanjing, Jiangsu, China | NJ128     | NJ128            | Y. Xu et al.      |
| <i>A. tataricum</i> subsp. <i>theiferum</i> (W.P.Fang) Y.S. Chen & P.C. de Jong | <i>Ginnala</i>     | Baoji, Shaanxi, China                          | Q105      | Q105             | S.L. Dong         |
| <i>A. laurinum</i> Hassk.                                                       | <i>Hyptiocarpa</i> | Xishuangbanna, Yunnan, China                   | LQM0060   | BB1908-0217      | Q.M. Li           |
| <i>A. laurinum</i> Hassk.                                                       | <i>Hyptiocarpa</i> | Xishuangbanna, Yunnan, China                   | LQM0426   | TD54-048         | Q.M. Li           |
| <i>A. carpinifolium</i> Siebold & Zucc.                                         | <i>Indivisa</i>    | Zhongshan Bot. Garden, Nanjing, Jiangsu, China | NJ216     | NJ216            | Y. Xu et al.      |
| <i>A. sterculiaceum</i> subsp. <i>franchetii</i> (Pax) A.E. Murray              | <i>Lithocarpa</i>  | Hualong mountain, Ankang, Shaanxi, China       | HL241     | 120424027        | Y.Q. Zhang et al. |
| <i>A. tonkinense</i> Lecomte                                                    | <i>Lithocarpa</i>  | Maolan, Guizhou, China                         | LB0954    | LB0954           | Y.F. Deng         |
| <i>A. sinopurpurascens</i> W.C. Cheng                                           | <i>Lithocarpa</i>  | Zhongshan Bot. Garden, Nanjing, Jiangsu, China | NJ209     | NJ209            | Y. Xu et al.      |
| <i>A. sterculiaceum</i> subsp. <i>franchetii</i> (Pax) A.E. Murray              | <i>Lithocarpa</i>  | Zhangjiajie, Hunan, China                      | QXJ107    | WBGQXJ107        | X.J. Qiao         |
| <i>A. davidii</i> subsp. <i>grosseri</i> (Pax) P.C. de Jong                     | <i>Macrantha</i>   | Baoji, Shaanxi, China                          | Ge131116  | Ge131116         | X.J. Ge           |
| <i>A. metcalfei</i> Rehder                                                      | <i>Macrantha</i>   | Wuzhi mountain, Ganzhou, Jiangxi, China        | GN134     | GN-134           | X.J. Ge et al.    |
| <i>A. maximowiczii</i> Pax                                                      | <i>Macrantha</i>   | Hualong mountain, Ankang, Shaanxi, China       | HL246     | HS124            | Y.Q. Zhang et al. |
| <i>A. tegmentosum</i> Maxim.                                                    | <i>Macrantha</i>   | Changbai mountain, Jilin, China                | JL049     | CBS067           | J. Ye             |



**Table S5.** (continued)

| Species                                                     | Section          | Locality                                 | Sample ID | Voucher specimen | Collector         |
|-------------------------------------------------------------|------------------|------------------------------------------|-----------|------------------|-------------------|
| <i>A. davidii</i> subsp. <i>grosseri</i> (Pax) P.C. de Jong | <i>Macrantha</i> | Baoji, Shaanxi, China                    | Q032      | Q032             | S.L. Dong         |
| <i>A. maximowiczii</i> Pax                                  | <i>Macrantha</i> | Baoji, Shaanxi, China                    | Q151      | Q151             | S.L. Dong         |
| <i>A. davidii</i> Franch.                                   | <i>Macrantha</i> | Zhangjiajie, Hunan, China                | QXJ070    | WBGQXJ070        | X.J. Qiao         |
| <i>A. davidii</i> subsp. <i>grosseri</i> (Pax) P.C. de Jong | <i>Macrantha</i> | Xian Bot. Garden, Shaanxi, China         | XA073     | XA073            | X.J. Ge           |
| <i>A. negundo</i> L.                                        | <i>Negundo</i>   | Hangzhou, Zhejiang, China                | HZ312     | HZ312            | Y. Xu et al.      |
| <i>A. henryi</i> Pax                                        | <i>Negundo</i>   | Baoji, Shaanxi, China                    | Q163      | Q163             | S.L. Dong         |
| <i>A. henryi</i> Pax                                        | <i>Negundo</i>   | Xian Bot. Garden, Shaanxi, China         | XA019     | XA019            | X.J. Ge           |
| <i>A. coriaceifolium</i> H. Lév.                            | <i>Oblonga</i>   | Fuzhou, Fujian, China                    | FZ070     | FZ070            | Y. Xu et al.      |
| <i>A. oblongum</i> Wall. ex DC.                             | <i>Oblonga</i>   | Hanzhong, Shaanxi, China                 | Ge130922  | Ge130922         | X.J. Ge           |
| <i>A. coriaceifolium</i> H. Lév.                            | <i>Oblonga</i>   | Guilin Bot. Garden, Guangxi, China       | GL120     | GL120            | Y. Xu et al.      |
| <i>A. sycopseoides</i> Chun                                 | <i>Oblonga</i>   | Guilin Bot. Garden, Guangxi, China       | GL333     | GL333            | Y. Xu et al.      |
| <i>A. oblongum</i> Wall. ex DC.                             | <i>Oblonga</i>   | Hualong mountain, Ankang, Shaanxi, China | HL238     | ZP201705         | Y.Q. Zhang et al. |
| <i>A. lanceolatum</i> Molliard                              | <i>Oblonga</i>   | Maolan, Guizhou, China                   | LB0962    | LB0962           | Y.F. Deng         |
| <i>A. oblongum</i> var. <i>concolor</i> Pax                 | <i>Oblonga</i>   | Wuhan Bot. Garden, Hubei, China          | X457      | wh043            | Y. Xu et al.      |
| <i>A. kwangsiense</i> W.P. Fang & M.Y. Fang                 | <i>Palmata</i>   | Guilin Bot. Garden, Guangxi, China       | GL196     | GL196            | Y. Xu et al.      |
| <i>A. tutcheri</i> Duthie                                   | <i>Palmata</i>   | Gannan Arboretum, Jiangxi, China         | GN029     | GN-029           | X.J. Ge et al.    |
| <i>A. elegantulum</i> W.P. Fang & P.L. Chiu                 | <i>Palmata</i>   | Gannan Arboretum, Jiangxi, China         | GN083     | GN-083           | X.J. Ge et al.    |
| <i>A. fabri</i> Hance                                       | <i>Palmata</i>   | Gannan Arboretum, Jiangxi, China         | GN092     | GN-092           | X.J. Ge et al.    |
| <i>A. tutcheri</i> Duthie                                   | <i>Palmata</i>   | Gannan Arboretum, Jiangxi, China         | GN100     | GN-100           | X.J. Ge et al.    |
| <i>A. olivaceum</i> W.P. Fang & P.L. Chiu                   | <i>Palmata</i>   | Gutian mountain, Quzhou, Zhejiang, China | GTS039    | GTS QC 039       | Z.X. Lai          |
| <i>A. japonicum</i> Thunb.                                  | <i>Palmata</i>   | Hangzhou Bot. Garden, Zhejiang, China    | HZ006     | HZ006            | Y. Xu et al.      |
| <i>A. pubinerve</i> Rehder                                  | <i>Palmata</i>   | Hangzhou, Zhejiang, China                | HZ328     | HZ328            | Y. Xu et al.      |
| <i>A. pseudosieboldianum</i> (Pax) Kom.                     | <i>Palmata</i>   | Changbai mountain, Jilin, China          | JL020     | CBS049           | J. Ye             |

**Table S5.** (continued)

| Species                                                         | Section            | Locality                                       | Sample ID | Voucher specimen | Collector    |
|-----------------------------------------------------------------|--------------------|------------------------------------------------|-----------|------------------|--------------|
| <i>A. calcaratum</i> Gagnep.                                    | <i>Palmata</i>     | Xishuangbanna, Yunnan, China                   | LQM0477   | LQM0477          | Q.M. Li      |
| <i>A. campbellii</i> Hook.f. & Thomson ex Hiern                 | <i>Palmata</i>     | Xishuangbanna, Yunnan, China                   | LQM1030   | LQM1030          | Y. Xu        |
| <i>A. fabri</i> Hance                                           | <i>Palmata</i>     | Zhongshan Bot. Garden, Nanjing, Jiangsu, China | NJ056     | NJ056            | Y. Xu et al. |
| <i>A. japonicum</i> Thunb.                                      | <i>Palmata</i>     | Zhongshan Bot. Garden, Nanjing, Jiangsu, China | NJ175     | NJ175            | Y. Xu et al. |
| <i>A. pauciflorum</i> W.P. Fang                                 | <i>Palmata</i>     | Zhongshan Bot. Garden, Nanjing, Jiangsu, China | NJ207     | NJ207            | Y. Xu et al. |
| <i>A. oliverianum</i> Pax                                       | <i>Palmata</i>     | Zhongshan Bot. Garden, Nanjing, Jiangsu, China | NJ208     | NJ208            | Y. Xu et al. |
| <i>A. linganense</i> W.P. Fang & P.L. Chiu                      | <i>Palmata</i>     | Zhongshan Bot. Garden, Nanjing, Jiangsu, China | NJ210     | NJ210            | Y. Xu et al. |
| <i>A. sinense</i> Pax                                           | <i>Palmata</i>     | Zhongshan Bot. Garden, Nanjing, Jiangsu, China | NJ217     | NJ217            | Y. Xu et al. |
| <i>A. laevigatum</i> Wall.                                      | <i>Palmata</i>     | Zhongshan Bot. Garden, Nanjing, Jiangsu, China | NJ245     | NJ245            | Y. Xu et al. |
| <i>A. oliverianum</i> Pax                                       | <i>Palmata</i>     | Baoji, Shaanxi, China                          | Q171      | Q171             | S.L. Dong    |
| <i>A. erianthum</i> Schwer.                                     | <i>Palmata</i>     | Baoji, Shaanxi, China                          | Q269      | Q269             | S.L. Dong    |
| <i>A. duplicatoserratum</i> var. <i>chinense</i> C. S. Chang    | <i>Palmata</i>     | Baoji, Shaanxi, China                          | Q350      | Q350             | S.L. Dong    |
| <i>A. flabellatum</i> Rehder                                    | <i>Palmata</i>     | Hanzhong, Shaanxi, China                       | Q840      | Q840             | S.L. Dong    |
| <i>A. flabellatum</i> Rehder                                    | <i>Palmata</i>     | Zhangjiajie, Hunan, China                      | QXJ162    | WBGQXJ162        | X.J. Qiao    |
| <i>A. ceriferum</i> Rehder                                      | <i>Palmata</i>     | Zhangjiajie, Hunan, China                      | QXJ214    | WBGQXJ214        | X.J. Qiao    |
| <i>A. wilsonii</i> Rehder                                       | <i>Palmata</i>     | Zhangjiajie, Hunan, China                      | QXJ215    | WBGQXJ215        | X.J. Qiao    |
| <i>A. wangchii</i> W.P. Fang                                    | <i>Palmata</i>     | Hechi, Guangxi, China                          | S86       | S86              | T.J. Liu     |
| <i>A. duplicatoserratum</i> var. <i>chinense</i> C. S. Chang    | <i>Palmata</i>     | Wuhan Bot. Garden, Hubei, China                | X520      | wh105            | Y. Xu et al. |
| <i>A. truncatum</i> Bunge                                       | <i>Platanoidea</i> | Pingshan, Hebei, China                         | Ge130727  | Ge130727         | X.J. Ge      |
| <i>A. shenkanense</i> W.P. Fang ex C.C. Fu                      | <i>Platanoidea</i> | Baoji, Shaanxi, China                          | Ge131027  | Ge131027         | X.J. Ge      |
| <i>A. miaotaiense</i> P.C. Tsoong                               | <i>Platanoidea</i> | Baoji, Shaanxi, China                          | Ge131047  | Ge131047         | X.J. Ge      |
| <i>A. shenkanense</i> W.P. Fang ex C.C. Fu                      | <i>Platanoidea</i> | Baoji, Shaanxi, China                          | Ge131117  | Ge131117         | X.J. Ge      |
| <i>A. amplum</i> subsp. <i>catalpifolium</i> (Rehder) Y.S. Chen | <i>Platanoidea</i> | Guilin Bot. Garden, Guangxi, China             | GL203     | GL203            | Y. Xu et al. |

**Table S5.** (continued)

| Species                                                | Section            | Locality                                       | Sample ID | Voucher specimen | Collector       |
|--------------------------------------------------------|--------------------|------------------------------------------------|-----------|------------------|-----------------|
| <i>A. campestre</i> L.                                 | <i>Platanoidea</i> | Hangzhou Bot. Garden, Zhejiang, China          | HZ025     | HZ025            | Y. Xu et al.    |
| <i>A. truncatum</i> Bunge                              | <i>Platanoidea</i> | Yichun, Heilongjiang, China                    | LSYL01    | LSYL01           | F. Jiang et al. |
| <i>A. truncatum</i> Bunge                              | <i>Platanoidea</i> | Zhongshan Bot. Garden, Nanjing, Jiangsu, China | NJ133     | NJ133            | Y. Xu et al.    |
| <i>A. truncatum</i> Bunge                              | <i>Platanoidea</i> | Zhongshan Bot. Garden, Nanjing, Jiangsu, China | NJ212     | NJ212            | Y. Xu et al.    |
| <i>A. mayrii</i> Schwer.                               | <i>Platanoidea</i> | Zhongshan Bot. Garden, Nanjing, Jiangsu, China | NJ213     | NJ213            | Y. Xu et al.    |
| <i>A. miaotaiense</i> P.C. Tsoong                      | <i>Platanoidea</i> | Baoji, Shaanxi, China                          | Q128      | Q128             | S.L. Dong       |
| <i>A. pictum</i> subsp. <i>mono</i> (Maxim.) H. Ohashi | <i>Platanoidea</i> | Baoji, Shaanxi, China                          | Q150      | Q150             | S.L. Dong       |
| <i>A. amplum</i> Rehder                                | <i>Platanoidea</i> | Zhangjiajie, Hunan, China                      | QXJ020    | WBGQXJ020        | X.J. Qiao       |
| <i>A. amplum</i> Rehder                                | <i>Platanoidea</i> | Zhangjiajie, Hunan, China                      | QXJ103    | WBGQXJ103        | X.J. Qiao       |
| <i>A. miaotaiense</i> P.C. Tsoong                      | <i>Platanoidea</i> | Xian Bot. Garden, Shaanxi, China               | XA023     | XA023            | X.J. Ge         |
| <i>A. ukurunduense</i> Trautv. & C.A. Mey.             | <i>Spicata</i>     | Yichun, Heilongjiang, China                    | LSYL28    | LSYL28           | F. Jiang et al. |
| <i>A. caudatum</i> Wall.                               | <i>Spicata</i>     | Baoji, Shaanxi, China                          | Q456      | Q456             | S.L. Dong       |
| <i>A. caudatum</i> Wall.                               | <i>Spicata</i>     | Baoji, Shaanxi, China                          | Q700      | Q700             | S.L. Dong       |
| <i>A. mandshuricum</i> Maxim.                          | <i>Trifoliata</i>  | Changbai mountain, Jilin, China                | CBS004    | CBS004           | J. Ye           |
| <i>A. nikoense</i> (Miq.) Maxim.                       | <i>Trifoliata</i>  | Hangzhou Bot. Garden, Zhejiang, China          | HZ200     | HZ200            | Y. Xu et al.    |
| <i>A. triflorum</i> Kom.                               | <i>Trifoliata</i>  | Changbai mountain, Jilin, China                | JL029     | CBS064           | J. Ye           |
| <i>A. griseum</i> (Franch.) Pax                        | <i>Trifoliata</i>  | Ankang, Shaanxi, China                         | Q888      | Q888             | S.L. Dong       |
| <i>A. griseum</i> (Franch.) Pax                        | <i>Trifoliata</i>  | Wuhan Bot. Garden, Hubei, China                | X422      | wh008            | Y. Xu et al.    |

**Table S6.** The comparison between nrDNA datasets that with and without ETS.

| Data set          | Aligned length (bp) | Length range (bp) | Variable sites |       | PI sites |       | SDE in tree-based method |
|-------------------|---------------------|-------------------|----------------|-------|----------|-------|--------------------------|
|                   |                     |                   | Number         | %     | Number   | %     |                          |
| partial ETS       | 834                 | 308-778           | 113            | 13.55 | 94       | 11.27 | NA                       |
| nrDNA without ETS | 5,939               | 5,810-5,856       | 255            | 4.29  | 203      | 3.42  | 71.42% (15/21)           |
| nrDNA             | 6,773               | 6,154-6,625       | 368            | 5.43  | 297      | 4.39  | 80.95% (17/21)           |

ETS: external transcribed spacer; SDE: species discriminatory efficiency. NA: not assessed.

**Table S7.** Plastomes downloaded from Genbank and their accession numbers.

| No. | Species                                         | Accession | No. | Species                                                    | Accession |
|-----|-------------------------------------------------|-----------|-----|------------------------------------------------------------|-----------|
| 1   | <i>Acer acuminatum</i>                          | MN864496  | 94  | <i>A. oliverianum</i>                                      | KY827815  |
| 2   | <i>A. amplum</i>                                | MH784399  | 95  | <i>A. oliverianum</i>                                      | MW067060  |
| 3   | <i>A. amplum</i>                                | MK648114  | 96  | <i>A. oliverianum</i>                                      | NC_051958 |
| 4   | <i>A. amplum</i>                                | MW067026  | 97  | <i>A. opalus</i>                                           | NC_056221 |
| 5   | <i>A. amplum</i>                                | MW493345  | 98  | <i>A. opalus</i> subsp. <i>obtusatum</i>                   | MW067057  |
| 6   | <i>A. amplum</i>                                | NC_050668 | 99  | <i>A. paihengii</i>                                        | MZ934750  |
| 7   | <i>A. amplum</i> subsp. <i>catalpifolium</i>    | MK479218  | 100 | <i>A. palmatum</i>                                         | MK578668  |
| 8   | <i>A. amplum</i> subsp. <i>catalpifolium</i>    | MW067027  | 101 | <i>A. palmatum</i>                                         | MW599990  |
| 9   | <i>A. amplum</i> subsp. <i>catalpifolium</i>    | NC_041080 | 102 | <i>A. palmatum</i>                                         | NC_034932 |
| 10  | <i>A. argutum</i>                               | NC_056202 | 103 | <i>A. palmatum</i> var. <i>palmatum</i>                    | MN864504  |
| 11  | <i>A. buergerianum</i>                          | MW067029  | 104 | <i>A. pauciflorum</i>                                      | NC_056222 |
| 12  | <i>A. buergerianum</i>                          | NC_034744 | 105 | <i>A. paxii</i>                                            | MK479215  |
| 13  | <i>A. buergerianum</i> subsp. <i>ningpoense</i> | KF753631  | 106 | <i>A. paxii</i>                                            | NC_056223 |
| 14  | <i>A. caesium</i>                               | MW067030  | 107 | <i>A. pectinatum</i>                                       | MW067064  |
| 15  | <i>A. caesium</i>                               | NC_051955 | 108 | <i>A. pectinatum</i>                                       | NC_050672 |
| 16  | <i>A. caesium</i> subsp. <i>giraldii</i>        | MK479225  | 109 | <i>A. pensylvanicum</i>                                    | NC_056224 |
| 17  | <i>A. calcaratum</i>                            | NC_056203 | 110 | <i>A. pentaphyllum</i>                                     | MK341079  |
| 18  | <i>A. campbellii</i>                            | MW801166  | 111 | <i>A. pentaphyllum</i>                                     | MK479216  |
| 19  | <i>A. campestre</i>                             | NC_056204 | 112 | <i>A. pentaphyllum</i>                                     | MN315278  |
| 20  | <i>A. cappadocicum</i>                          | MK479217  | 113 | <i>A. pentaphyllum</i>                                     | MN661390  |
| 21  | <i>A. cappadocicum</i>                          | NC_051956 | 114 | <i>A. pentaphyllum</i>                                     | MN864505  |
| 22  | <i>A. cappadocicum</i> subsp. <i>divergens</i>  | MW067034  | 115 | <i>A. pentaphyllum</i>                                     | NC_049167 |
| 23  | <i>A. cappadocicum</i> subsp. <i>sinicum</i>    | MW067035  | 116 | <i>A. pictum</i> subsp. <i>mono</i>                        | MK479227  |
| 24  | <i>A. carpinifolium</i>                         | MN864497  | 117 | <i>A. pictum</i> subsp. <i>mono</i>                        | NC_049127 |
| 25  | <i>A. caudatifolium</i>                         | MK479219  | 118 | <i>A. pilosum</i>                                          | MN864506  |
| 26  | <i>A. caudatifolium</i>                         | MK479226  | 119 | <i>A. platanoides</i>                                      | NC_051959 |
| 27  | <i>A. ceriferum</i>                             | MW800986  | 120 | <i>A. pseudoplatanus</i>                                   | MN864508  |
| 28  | <i>A. cinnamomifolium</i>                       | MK479220  | 121 | <i>A. pseudosieboldianum</i>                               | MW067066  |
| 29  | <i>A. cinnamomifolium</i>                       | MT752969  | 122 | <i>A. pseudosieboldianum</i>                               | NC_046487 |
| 30  | <i>A. cinnamomifolium</i>                       | NC_056164 | 123 | <i>A. pseudosieboldianum</i> var. <i>microsieboldianum</i> | MW067067  |
| 31  | <i>A. circinatum</i>                            | NC_056205 | 124 | <i>A. pubipetiolatum</i> var. <i>pingpienense</i>          | MZ944848  |
| 32  | <i>A. cissifolium</i>                           | MW067037  | 125 | <i>A. pycnanthum</i>                                       | NC_056225 |
| 33  | <i>A. cissifolium</i>                           | NC_049162 | 126 | <i>A. robustum</i>                                         | MK479212  |
| 34  | <i>A. cordatum</i>                              | MW800944  | 127 | <i>A. rubescens</i>                                        | NC_056226 |
| 35  | <i>A. coriaceifolium</i>                        | NC_050669 | 128 | <i>A. rubrum</i>                                           | MN864509  |
| 36  | <i>A. crataegifolium</i>                        | NC_056206 | 129 | <i>A. rufinerve</i>                                        | NC_056227 |
| 37  | <i>A. davidii</i>                               | MK193784  | 130 | <i>A. saccharinum</i>                                      | NC_056228 |
| 38  | <i>A. davidii</i>                               | MK193785  | 131 | <i>A. saccharum</i>                                        | NC_051960 |
| 39  | <i>A. davidii</i>                               | MK193786  | 132 | <i>A. saccharum</i> subsp. <i>floridanum</i>               | MW067072  |
| 40  | <i>A. davidii</i>                               | MW800922  | 133 | <i>A. saccharum</i> subsp. <i>leucoderme</i>               | MW067073  |
| 41  | <i>A. davidii</i>                               | NC_030331 | 134 | <i>A. saccharum</i> subsp. <i>nigrum</i>                   | MW067074  |
| 42  | <i>A. diabolicum</i>                            | NC_056207 | 135 | <i>A. saccharum</i> subsp. <i>saccharum</i>                | MW067075  |
| 43  | <i>A. distylum</i>                              | NC_056209 | 136 | <i>A. saccharum</i> subsp. <i>skutchii</i>                 | MW067080  |
| 44  | <i>A. elegantulum</i>                           | MW801101  | 137 | <i>A. sempervirens</i>                                     | NC_056229 |
| 45  | <i>A. elegantulum</i>                           | NC_056210 | 138 | <i>A. serrulatum</i>                                       | NC_056230 |
| 46  | <i>A. fabri</i>                                 | MW067044  | 139 | <i>A. shenkanense</i>                                      | NC_056231 |
| 47  | <i>A. fabri</i>                                 | MZ664553  | 140 | <i>A. sikkimense</i>                                       | NC_056232 |
| 48  | <i>A. fabri</i>                                 | NC_050670 | 141 | <i>A. sinense</i>                                          | NC_057529 |
| 49  | <i>A. fenzelianum</i>                           | MN315273  | 142 | <i>A. sino-oblongum</i>                                    | NC_040106 |
| 50  | <i>A. fenzelianum</i>                           | NC_045527 | 143 | <i>A. stachyophyllum</i>                                   | NC_051961 |

**Table S7.** (continued)

| No. | Species                  | Accession | No. | Species                                               | Accession |
|-----|--------------------------|-----------|-----|-------------------------------------------------------|-----------|
| 51  | <i>A. flabellatum</i>    | MF787384  | 144 | <i>A. stachyophyllum</i> subsp. <i>betulifolium</i>   | MW067082  |
| 52  | <i>A. flabellatum</i>    | MK479222  | 145 | <i>A. stachyophyllum</i> subsp. <i>stachyophyllum</i> | MW067081  |
| 53  | <i>A. flabellatum</i>    | MW067032  | 146 | <i>A. sterculiaceum</i>                               | NC_050673 |
| 54  | <i>A. flabellatum</i>    | NC_050671 | 147 | <i>A. sterculiaceum</i> subsp. <i>franchetii</i>      | MN315284  |
| 55  | <i>A. glabrum</i>        | MN864498  | 148 | <i>A. sterculiaceum</i> subsp. <i>franchetii</i>      | MW067083  |
| 56  | <i>A. granatense</i>     | NC_056211 | 149 | <i>A. sterculiaceum</i> subsp. <i>franchetii</i>      | MW067093  |
| 57  | <i>A. grandidentatum</i> | NC_056212 | 150 | <i>A. sterculiaceum</i> subsp. <i>franchetii</i>      | MW800946  |
| 58  | <i>A. griseum</i>        | MT355071  | 151 | <i>A. sterculiaceum</i> subsp. <i>sterculiaceum</i>   | MN864510  |
| 59  | <i>A. griseum</i>        | MT355072  | 152 | <i>A. sutchuenense</i> subsp. <i>tienchuanense</i>    | NC_049166 |
| 60  | <i>A. griseum</i>        | MT355073  | 153 | <i>A. takesimense</i>                                 | MW067084  |
| 61  | <i>A. griseum</i>        | MW067047  | 154 | <i>A. takesimense</i>                                 | NC_046488 |
| 62  | <i>A. griseum</i>        | NC_034346 | 155 | <i>A. tataricum</i>                                   | NC_050674 |
| 63  | <i>A. henryi</i>         | MW067048  | 156 | <i>A. tataricum</i> subsp. <i>aidzuense</i>           | MW067085  |
| 64  | <i>A. henryi</i>         | NC_049163 | 157 | <i>A. tataricum</i> subsp. <i>ginnala</i>             | MK479223  |
| 65  | <i>A. hyrcanum</i>       | NC_056213 | 158 | <i>A. tataricum</i> subsp. <i>ginnala</i>             | MK479224  |
| 66  | <i>A. japonicum</i>      | NC_056214 | 159 | <i>A. tataricum</i> subsp. <i>ginnala</i>             | MN790641  |
| 67  | <i>A. laevigatum</i>     | NC_042443 | 160 | <i>A. tataricum</i> subsp. <i>ginnala</i>             | MN864511  |
| 68  | <i>A. laurinum</i>       | NC_056215 | 161 | <i>A. tataricum</i> subsp. <i>semenovii</i>           | MW067086  |
| 69  | <i>A. leipoense</i>      | MZ043780  | 162 | <i>A. tataricum</i> subsp. <i>tataricum</i>           | MW067087  |
| 70  | <i>A. leipoense</i>      | MZ725939  | 163 | <i>A. tegmentosum</i>                                 | MK942342  |
| 71  | <i>A. lobelii</i>        | NC_056216 | 164 | <i>A. tegmentosum</i>                                 | NC_056233 |
| 72  | <i>A. longipes</i>       | MW067053  | 165 | <i>A. tenuifolium</i>                                 | NC_056234 |
| 73  | <i>A. longipes</i>       | NC_049126 | 166 | <i>A. tetramerum</i>                                  | MK479228  |
| 74  | <i>A. lucidum</i>        | MK479214  | 167 | <i>A. trautvetteri</i>                                | NC_056235 |
| 75  | <i>A. macrophyllum</i>   | NC_056217 | 168 | <i>A. triflorum</i>                                   | MW067091  |
| 76  | <i>A. mandshuricum</i>   | MW067055  | 169 | <i>A. triflorum</i>                                   | NC_047296 |
| 77  | <i>A. mandshuricum</i>   | NC_049164 | 170 | <i>A. truncatum</i>                                   | MH638284  |
| 78  | <i>A. miaotaiense</i>    | NC_030343 | 171 | <i>A. truncatum</i>                                   | MH716034  |
| 79  | <i>A. micranthum</i>     | MN864500  | 172 | <i>A. truncatum</i>                                   | MK479213  |
| 80  | <i>A. monspessulanum</i> | NC_056218 | 173 | <i>A. truncatum</i>                                   | NC_037211 |
| 81  | <i>A. morrisonense</i>   | NC_029371 | 174 | <i>A. tsinglingense</i>                               | MN393475  |
| 82  | <i>A. negundo</i>        | MN841452  | 175 | <i>A. tutcheri</i>                                    | MW067094  |
| 83  | <i>A. negundo</i>        | MN864501  | 176 | <i>A. tutcheri</i>                                    | NC_051542 |
| 84  | <i>A. negundo</i>        | MT336153  | 177 | <i>A. ukurunduense</i>                                | NC_060654 |
| 85  | <i>A. negundo</i>        | NC_051957 | 178 | <i>A. velutinum</i>                                   | NC_056236 |
| 86  | <i>A. nikoense</i>       | MN864499  | 179 | <i>A. wilsonii</i>                                    | MW067096  |
| 87  | <i>A. nikoense</i>       | NC_049165 | 180 | <i>A. wilsonii</i>                                    | NC_040988 |
| 88  | <i>A. nipponicum</i>     | MN864502  | 181 | <i>A. yangbiense</i>                                  | CM017775  |
| 89  | <i>A. oblongum</i>       | MN864503  | 182 | <i>A. yangbiense</i>                                  | MK479229  |
| 90  | <i>A. oblongum</i>       | MZ073338  | 183 | <i>A. yangbiense</i>                                  | NC_050351 |
| 91  | <i>A. oblongum</i>       | NC_056208 | 184 | <i>A. yangjuechi</i>                                  | NC_053258 |
| 92  | <i>A. obtusifolium</i>   | NC_056219 | 185 | <i>Dimocarpus longan</i>                              | MW067098  |
| 93  | <i>A. olivaceum</i>      | NC_056220 | 186 | <i>Litchi chinensis</i>                               | MW067100  |

**Table S8.** Genbank accession numbers of *Acer* plant materials generated in this study.

| <b>Species</b>                                   | <b>Sample ID</b> | <b>SRA accession</b> | <b>Plastome accession</b> | <b>nrDNA accession</b> |
|--------------------------------------------------|------------------|----------------------|---------------------------|------------------------|
| <i>Acer amplum</i>                               | QXJ020           | SRR21071082          | OP219592                  | OP221123               |
| <i>A. amplum</i>                                 | QXJ103           | SRR21071079          | OP219594                  | OP221125               |
| <i>A. amplum</i> subsp. <i>catalpifolium</i>     | GL203            | SRR21071145          | OP219534                  | OP221065               |
| <i>A. barbinerve</i>                             | JL008            | SRR21071128          | OP219550                  | OP221081               |
| <i>A. calcaratum</i>                             | LQM0477          | SRR21071118          | OP219559                  | OP221090               |
| <i>A. campbellii</i>                             | LQM1030          | SRR21071117          | OP219560                  | OP221091               |
| <i>A. campestre</i>                              | HZ025            | SRR21071132          | OP219546                  | OP221077               |
| <i>A. carpinifolium</i>                          | NJ216            | SRR21071102          | OP219573                  | OP221104               |
| <i>A. caudatum</i>                               | Q456             | SRR21071086          | OP219588                  | OP221119               |
| <i>A. caudatum</i>                               | Q700             | SRR21071085          | OP219589                  | OP221120               |
| <i>A. ceriferum</i>                              | QXJ214           | SRR21071076          | OP219597                  | OP221128               |
| <i>A. coriaceifolium</i>                         | FZ070            | SRR21071147          | OP219524                  | OP221055               |
| <i>A. coriaceifolium</i>                         | GL120            | SRR21071066          | OP219532                  | OP221063               |
| <i>A. davidii</i>                                | QXJ070           | SRR21071080          | OP219593                  | OP221124               |
| <i>A. davidii</i> subsp. <i>grosseri</i>         | Ge131116         | SRR21071092          | OP219530                  | OP221061               |
| <i>A. davidii</i> subsp. <i>grosseri</i>         | Q032             | SRR21071099          | OP219576                  | OP221107               |
| <i>A. davidii</i> subsp. <i>grosseri</i>         | XA073            | SRR21071067          | OP219605                  | OP221136               |
| <i>A. duplicatoserratum</i> var. <i>chinense</i> | Q350             | SRR21071087          | OP219587                  | OP221118               |
| <i>A. duplicatoserratum</i> var. <i>chinense</i> | X520             | SRR21071071          | OP219602                  | OP221133               |
| <i>A. elegantulum</i>                            | GN083            | SRR21071142          | OP219537                  | OP221068               |
| <i>A. erianthum</i>                              | Q269             | SRR21071088          | OP219586                  | OP221117               |
| <i>A. fabri</i>                                  | GN092            | SRR21071141          | OP219538                  | OP221069               |
| <i>A. fabri</i>                                  | NJ056            | SRR21071113          | OP219563                  | OP221094               |
| <i>A. flabellatum</i>                            | Q840             | SRR21071084          | OP219590                  | OP221121               |
| <i>A. flabellatum</i>                            | QXJ162           | SRR21071077          | OP219596                  | OP221127               |
| <i>A. griseum</i>                                | Q888             | SRR21071083          | OP219591                  | OP221122               |
| <i>A. griseum</i>                                | X422             | SRR21071073          | OP219600                  | OP221131               |
| <i>A. henryi</i>                                 | Q163             | SRR21071093          | OP219582                  | OP221113               |
| <i>A. henryi</i>                                 | XA019            | SRR21071069          | OP219603                  | OP221134               |
| <i>A. japonicum</i>                              | HZ006            | SRR21071133          | OP219545                  | OP221076               |
| <i>A. japonicum</i>                              | NJ175            | SRR21071110          | OP219566                  | OP221097               |
| <i>A. kwangsiense</i>                            | GL196            | SRR21071146          | OP219533                  | OP221064               |
| <i>A. laevigatum</i>                             | NJ245            | SRR21071100          | OP219575                  | OP221106               |
| <i>A. lanceolatum</i>                            | LB0962           | SRR21071121          | OP219556                  | OP221087               |
| <i>A. laurinum</i>                               | LQM0060          | SRR21071120          | OP219557                  | OP221088               |
| <i>A. laurinum</i>                               | LQM0426          | SRR21071119          | OP219558                  | OP221089               |
| <i>A. linganense</i>                             | NJ210            | SRR21071106          | OP219570                  | OP221101               |
| <i>A. mandshuricum</i>                           | CBS004           | SRR21071148          | OP219523                  | OP221054               |
| <i>A. maximowiczii</i>                           | HL246            | SRR21071134          | OP219544                  | OP221075               |
| <i>A. maximowiczii</i>                           | Q151             | SRR21071095          | OP219580                  | OP221111               |
| <i>A. mayrii</i>                                 | NJ213            | SRR21071104          | OP219572                  | OP221103               |
| <i>A. metcalfi</i>                               | GN134            | SRR21071139          | OP219540                  | OP221071               |

**Table S8.** (continued)

| <b>Species</b>                                      | <b>Sample ID</b> | <b>SRA accession</b> | <b>Plastome accession</b> | <b>nrDNA accession</b> |
|-----------------------------------------------------|------------------|----------------------|---------------------------|------------------------|
| <i>A. miaotaiense</i>                               | Ge131047         | SRR21071103          | OP219529                  | OP221060               |
| <i>A. miaotaiense</i>                               | Q128             | SRR21071097          | OP219578                  | OP221109               |
| <i>A. miaotaiense</i>                               | XA023            | SRR21071068          | OP219604                  | OP221135               |
| <i>A. negundo</i>                                   | HZ312            | SRR21071130          | OP219548                  | OP221079               |
| <i>A. nikoense</i>                                  | HZ200            | SRR21071131          | OP219547                  | OP221078               |
| <i>A. oblongum</i>                                  | Ge130922         | SRR21071125          | OP219527                  | OP221058               |
| <i>A. oblongum</i>                                  | HL238            | SRR21071137          | OP219542                  | OP221073               |
| <i>A. oblongum</i> var. <i>concolor</i>             | X457             | SRR21071072          | OP219601                  | OP221132               |
| <i>A. olivaceum</i>                                 | GTS039           | SRR21071138          | OP219541                  | OP221072               |
| <i>A. oliverianum</i>                               | NJ208            | SRR21071108          | OP219568                  | OP221099               |
| <i>A. oliverianum</i>                               | Q171             | SRR21071091          | OP219583                  | OP221114               |
| <i>A. pauciflorum</i>                               | NJ207            | SRR21071109          | OP219567                  | OP221098               |
| <i>A. pictum</i> subsp. <i>mono</i>                 | Q150             | SRR21071096          | OP219579                  | OP221110               |
| <i>A. pseudoplatanus</i>                            | Ge19021          | SRR21071070          | OP219525                  | OP221056               |
| <i>A. pseudosieboldianum</i>                        | JL020            | SRR21071127          | OP219551                  | OP221082               |
| <i>A. pubinerve</i>                                 | HZ328            | SRR21071129          | OP219549                  | OP221080               |
| <i>A. shenkanense</i>                               | Ge131027         | SRR21071114          | OP219528                  | OP221059               |
| <i>A. shenkanense</i>                               | Ge131117         | SRR21071081          | OP219531                  | OP221062               |
| <i>A. sinense</i>                                   | NJ217            | SRR21071101          | OP219574                  | OP221105               |
| <i>A. sinopurpurascens</i>                          | NJ209            | SRR21071107          | OP219569                  | OP221100               |
| <i>A. stachyophyllum</i> subsp. <i>betulifolium</i> | Q152             | SRR21071094          | OP219581                  | OP221112               |
| <i>A. stachyophyllum</i> subsp. <i>betulifolium</i> | Q264             | SRR21071090          | OP219584                  | OP221115               |
| <i>A. stachyophyllum</i> subsp. <i>betulifolium</i> | Q265             | SRR21071089          | OP219585                  | OP221116               |
| <i>A. sterculiaceum</i> subsp. <i>franchetii</i>    | HL241            | SRR21071135          | OP219543                  | OP221074               |
| <i>A. sterculiaceum</i> subsp. <i>franchetii</i>    | QXJ107           | SRR21071078          | OP219595                  | OP221126               |
| <i>A. sycopseoides</i>                              | GL333            | SRR21071144          | OP219535                  | OP221066               |
| <i>A. tataricum</i> subsp. <i>ginnala</i>           | JL054            | SRR21071123          | OP219554                  | OP221085               |
| <i>A. tataricum</i> subsp. <i>theiferum</i>         | NJ128            | SRR21071112          | OP219564                  | OP221095               |
| <i>A. tataricum</i> subsp. <i>theiferum</i>         | Q105             | SRR21071098          | OP219577                  | OP221108               |
| <i>A. tegmentosum</i>                               | JL049            | SRR21071124          | OP219553                  | OP221084               |
| <i>A. tonkinense</i>                                | LB0954           | SRR21071122          | OP219555                  | OP221086               |
| <i>A. triflorum</i>                                 | JL029            | SRR21071126          | OP219552                  | OP221083               |
| <i>A. truncatum</i>                                 | Ge130727         | SRR21071136          | OP219526                  | OP221057               |
| <i>A. truncatum</i>                                 | LSYL01           | SRR21071116          | OP219561                  | OP221092               |
| <i>A. truncatum</i>                                 | NJ133            | SRR21071111          | OP219565                  | OP221096               |
| <i>A. truncatum</i>                                 | NJ212            | SRR21071105          | OP219571                  | OP221102               |
| <i>A. tutcheri</i>                                  | GN029            | SRR21071143          | OP219536                  | OP221067               |
| <i>A. tutcheri</i>                                  | GN100            | SRR21071140          | OP219539                  | OP221070               |
| <i>A. ukurunduense</i>                              | LSYL28           | SRR21071115          | OP219562                  | OP221093               |
| <i>A. wangchii</i>                                  | S86              | SRR21071074          | OP219599                  | OP221130               |
| <i>A. wilsonii</i>                                  | QXJ215           | SRR21071075          | OP219598                  | OP221129               |



**Table S9.** The partition scheme of 80 coding sequences (CDSs).

| <b>Subset</b> | <b>Best Model</b> | <b>Partition scheme</b>                         |
|---------------|-------------------|-------------------------------------------------|
| 1             | GTR+I+G           | <i>rps16, accD, atpF, rpl33</i>                 |
| 2             | GTR+I+G           | <i>rpoC1, atpA, rpl16, ndhH, rpoB</i>           |
| 3             | GTR+I+G           | <i>clpP, ndhJ, rps11, atpB, psbN</i>            |
| 4             | GTR+G             | <i>petA, rpl14, atpE, rpl20, rps14</i>          |
| 5             | GTR+I+G           | <i>psbB, psbC, atpH, psbH</i>                   |
| 6             | TVM+I+G           | <i>ndhE, atpI, psbZ, ndhK, petD, psaJ, psbI</i> |
| 7             | TVM+I+G           | <i>ccsA, ycf4, ndhD</i>                         |
| 8             | TVM+I+G           | <i>cemA, ndhA</i>                               |
| 9             | TVM+I+G           | <i>matK</i>                                     |
| 10            | TVM               | <i>ndhB, psbF</i>                               |
| 11            | GTR+G             | <i>petL, psbT, ndhG, ndhC, psbK</i>             |
| 12            | TVM+I+G           | <i>ndhF</i>                                     |
| 13            | GTR+I+G           | <i>ndhI, psbM</i>                               |
| 14            | HKY               | <i>orf42</i>                                    |
| 15            | GTR+I+G           | <i>psaC, psbE, psbJ, psbD, petB, psaA, psaB</i> |
| 16            | HKY               | <i>petN, petG</i>                               |
| 17            | TRN+I+G           | <i>psaI, psbL</i>                               |
| 18            | GTR+I+G           | <i>psbA</i>                                     |
| 19            | GTR+I+G           | <i>rbcL</i>                                     |
| 20            | TVM+G             | <i>rpl22</i>                                    |
| 21            | K81UF             | <i>rps12, rpl2, rps7, rpl23</i>                 |
| 22            | TIM+I+G           | <i>rpl32</i>                                    |
| 23            | TVM+I             | <i>rpl36, ycf3</i>                              |
| 24            | GTR+I+G           | <i>rpoA, rps3, rps15</i>                        |
| 25            | TVM+I+G           | <i>rpoC2</i>                                    |
| 26            | TVM+I             | <i>rps4, rps18</i>                              |
| 27            | TVM+I+G           | <i>rps8, rps19</i>                              |
| 28            | TVM+I+G           | <i>rps2</i>                                     |
| 29            | K81               | <i>ycf15</i>                                    |
| 30            | TVM+I+G           | <i>ycf1</i>                                     |
| 31            | TVM+I+G           | <i>ycf2</i>                                     |
